# Supplementary material for: A first-principles understanding of the CO-assisted NO reduction on the IrRu/Al2O3catalyst under O2-rich conditions
Source: Royal Society of Chemistry journal article supplement (doi:10.1039/d1cy00744k), 2021-01-01
Supplement: d1cy00744k1.pdf [file d1cy00744k1.pdf]

# Electronic Supplementary Information

## **A first-principles understanding of the CO-assisted NO reduction on the IrRu/Al<sub>2</sub>O<sub>3</sub> catalyst in O<sub>2</sub>-rich condition**

Malik Waqar Arshad<sup>1,2</sup>, Dong Hun Kim<sup>3</sup>, Young-Woo You<sup>3,4</sup>, Soo Min Kim<sup>2,3,4</sup>, Il Jeong Heo<sup>3,4\*</sup>  
Seok Ki Kim<sup>1,2\*</sup>

<sup>1</sup>C1 Gas & Carbon Convergent Research Center, Korea Research institute of Chemical Technology (KRICT), 141 Gajeong-ro, Yuseong-gu, Daejeon 34114, Republic of Korea.

<sup>2</sup>University of Science & Technology, Advanced Materials and Chemical Engineering Technology (UST), 217 Gajeong-ro, Yuseong-gu, Daejeon 34113, Republic of Korea.

<sup>3</sup>Environment & Sustainable Resources Research Center, Korea Research institute of Chemical Technology (KRICT), 141 Gajeong-ro, Yuseong-gu, Daejeon 34114, Republic of Korea.

<sup>4</sup>Convergent Chemistry of Air Pollution Center, Korea Research institute of Chemical Technology (KRICT), 141 Gajeong-ro, Yuseong-gu, Daejeon 34114, Republic of Korea.

\*Corresponding authors: [skkim726@kRICT.re.kr](mailto:skkim726@kRICT.re.kr), [zaiseok@kRICT.re.kr](mailto:zaiseok@kRICT.re.kr)

## List of Figures

**Fig. S1.** Optimized geometry (a) Ir (111) primitive cell with bader charges (b) Ir<sub>64</sub> (111) supercell (c) Ru (001) primitive cell with bader charges and (d) Ru<sub>64</sub> (001) supercell. Green and orange balls represent the Ir and Ru, respectively. .... 5

**Fig. S2.** Optimized bulk alloy models used for lattice parameter analysis (a) Ir<sub>3</sub>Ru<sub>1</sub> primitive cell with bader charges (b) Ir<sub>48</sub>Ru<sub>16</sub> supercell (c) Ru<sub>3</sub>Ir<sub>1</sub> primitive cell with bader charges (d) Ru<sub>48</sub>Ir<sub>16</sub> supercell. Green and orange balls represent the Ir and Ru, respectively. .... 5

**Fig. S3.** Optimized bulk alloy slab models used for surface oxygen analysis. O\* was adsorbed on three fold hollow hcp site.(a) Ir<sub>64</sub>O<sub>1</sub>(111) super cell (b) Ru<sub>64</sub>O<sub>1</sub> (001) supercell (c) Ir<sub>48</sub>Ru<sub>16</sub>O<sub>1</sub>(111) super cell (d) Ru<sub>48</sub>Ir<sub>16</sub>O<sub>1</sub> supercell. Green, orange, and red balls represent the Ir, Ru, and oxygen, respectively. .... 6

**Fig. S4.** Optimized surface oxygen Ir-slab model with different adsorbates at their stable sites. O\* was adsorbed on hcp hollow site and most stable site of each adsorbate is mention under each figure. Green, red, brown, and violet balls represent the Ir, O, C, and N, respectively. .... 7

**Fig. S5.** Optimized surface oxygen Ru-slab model with different adsorbates at their stable sites. O\* was adsorbed on hcp hollow site and most stable site of each adsorbate is mention under each figure. Orange, red, brown, and violet balls represent the Ru, O, C, and N, respectively. .... 8

**Fig. S6.** Optimized surface oxygen Ir<sub>3</sub>Ru<sub>1</sub>-slab model with different adsorbates at their stable sites. O\* was adsorbed on hcp hollow site and most stable site of each adsorbate is mention under each figure. Green, orange, red, brown, and violet balls represent the Ir, Ru, O, C, and N, respectively. .... 9

**Fig. S7.** Optimized surface oxygen Ru<sub>3</sub>Ir<sub>1</sub>-slab model with different adsorbates at their stable sites. O\* was adsorbed on hcp hollow site and most stable site of each adsorbate is mention under each figure. Green, orange, red, brown, and violet balls represent the Ir, Ru, O, C, and N, respectively. .... 10

**Fig. S8.** Optimized surface oxygen slab models used for dominant effect study (a) Ir-Ru<sub>ligand</sub> (b) Ru-Ir<sub>ligand</sub> (c) Ir compressive strain (d) Ru tensile strain (e) Ir-Ru<sub>ensemble</sub> (f) Ru-Ir<sub>ensemble</sub> models. Green, orange, and red balls represent the Ir, Ru, and O, respectively. .... 11

**Fig. S9.** Reaction energy profile, NO+CO reactions.  $T = 150\text{ }^{\circ}\text{C}$  and  $P = 0.1\text{ MPa}$ ..... 12

**Fig. S10.** Reaction energy profile, NO+CO+O<sub>2</sub> reactions.  $T = 150\text{ }^{\circ}\text{C}$  and  $P = 0.1\text{ MPa}$  ..... 12

**Fig. S12.** Reaction energy profile of ligand effect with surface oxygen.  $T = 150\text{ }^{\circ}\text{C}$  and  $P = 0.1\text{ MPa}$ .... 13

**Fig. S13.** Reaction energy profile of ligand effect without surface oxygen.  $T = 200\text{ }^{\circ}\text{C}$  and  $P = 0.1\text{ MPa}$ 14

**Fig. S14.** Reaction energy profile of strain effect without surface oxygen.  $T = 150\text{ }^{\circ}\text{C}$  and  $P = 0.1\text{ MPa}$ .14

**Fig. S15.** Reaction energy profile of strain effect with surface oxygen.  $T = 150\text{ }^{\circ}\text{C}$  and  $P = 0.1\text{ MPa}$ ..... 15

**Fig. S16.** Reaction energy profile of strain effect without surface oxygen.  $T = 200\text{ }^{\circ}\text{C}$  and  $P = 0.1\text{ MPa}$  15

**Fig. S17.** Reaction energy profile of dominant effect in an IrRu alloy formation without surface oxygen.  $T = 150\text{ }^{\circ}\text{C}$  and  $P = 0.1\text{ MPa}$ ..... 16

**Fig. S18.** Reaction energy profile of dominant effect in an IrRu alloy formation with surface oxygen.  $T = 150\text{ }^{\circ}\text{C}$  and  $P = 0.1\text{ MPa}$ ..... 16

|                                                                                                                                                                                                                                                                                                                                                                                                                                                                                             |    |
|---------------------------------------------------------------------------------------------------------------------------------------------------------------------------------------------------------------------------------------------------------------------------------------------------------------------------------------------------------------------------------------------------------------------------------------------------------------------------------------------|----|
| <b>Fig. S19.</b> Reaction energy profile of dominant effect in an IrRu alloy formation without surface oxygen. $T = 200\text{ }^{\circ}\text{C}$ and $P = 0.1\text{ MPa}$ .....                                                                                                                                                                                                                                                                                                             | 17 |
| <b>Fig. S20.</b> Mean difference between the median values ( $E_{\text{mid}}$ ) of the pure Ir and Ru catalysts and the energy values of the different alloy surfaces without surface oxygen. $T = 150\text{ }^{\circ}\text{C}$ and $P = 0.1\text{ MPa}$ .....                                                                                                                                                                                                                              | 18 |
| <b>Fig. S21.</b> Mean difference between the median values ( $E_{\text{mid}}$ ) of the pure Ir and Ru catalysts and the energy values of the different alloy surfaces with surface oxygen. $T = 150\text{ }^{\circ}\text{C}$ and $P = 0.1\text{ MPa}$ .....                                                                                                                                                                                                                                 | 18 |
| <b>Fig. S23.</b> Activation energy ( $E_a$ ) trends for three important reactions among the different catalytic models with surface oxygen for different catalytic models. $T = 150\text{ }^{\circ}\text{C}$ and $P = 0.1\text{ MPa}$ .....                                                                                                                                                                                                                                                 | 19 |
| <b>Fig. S22.</b> Activation energy ( $E_a$ ) trends for three important reactions among the different catalytic models without surface oxygen for different catalytic models. $T = 150\text{ }^{\circ}\text{C}$ and $P = 0.1\text{ MPa}$ .....                                                                                                                                                                                                                                              | 19 |
| <b>Fig. S24.</b> Optimized geometry and gibbs free formation energy of CO oxidation reaction over Ir, Ru and their alloy surfaces at $T = 200\text{ }^{\circ}\text{C}$ and $P = 0.1\text{ MPa}$ . To calculate the formation energy, we used $\text{H}_2\text{O}$ , $\text{N}_2$ , $\text{CH}_4$ , and $\text{H}_2$ as standard electronic energies. Green, orange, red, and brown balls represent the Ir, Ru, O, and C, respectively.....                                                  | 20 |
| <b>Fig. S25.</b> Optimized geometry and gibbs free formation energy of $\text{N}_2$ formation via N–N recombination reaction over Ir, Ru and their alloy surfaces at $T = 200\text{ }^{\circ}\text{C}$ and $P = 0.1\text{ MPa}$ . To calculate the formation energy, we used $\text{H}_2\text{O}$ , $\text{N}_2$ , $\text{CH}_4$ , and $\text{H}_2$ as standard electronic energies. Green, orange, and violet balls represent the Ir, Ru, and N, respectively.....                         | 21 |
| <b>Fig. S26.</b> Optimized geometry and gibbs free formation energy of $\text{N}_2\text{O}$ decomposition in $\text{N}_2$ formation reaction over Ir, Ru and their alloy surfaces at $T = 200\text{ }^{\circ}\text{C}$ and $P = 0.1\text{ MPa}$ . To calculate the formation energy, we used $\text{H}_2\text{O}$ , $\text{N}_2$ , $\text{CH}_4$ , and $\text{H}_2$ as standard electronic energies. Green, orange, red, and violet balls represent the Ir, Ru, O, and N, respectively..... | 22 |
| <b>Fig. S27.</b> Optimized geometry and gibbs free formation energy of $\text{N}_2\text{O}$ formation reaction over Ir, Ru and their alloy surfaces at $T = 200\text{ }^{\circ}\text{C}$ and $P = 0.1\text{ MPa}$ . To calculate the formation energy, we used $\text{H}_2\text{O}$ , $\text{N}_2$ , $\text{CH}_4$ , and $\text{H}_2$ as standard electronic energies. Green, orange, red, and violet balls represent the Ir, Ru, O, and N, respectively. ....                              | 23 |
| <b>Fig. S28.</b> Optimized geometry and gibbs free formation energy of NCO formation reaction over Ir, Ru and their alloy surfaces at $T = 200\text{ }^{\circ}\text{C}$ and $P = 0.1\text{ MPa}$ . To calculate the formation energy, we used $\text{H}_2\text{O}$ , $\text{N}_2$ , $\text{CH}_4$ , and $\text{H}_2$ as standard electronic energies. Green, orange, red, brown, and violet balls represent the Ir, Ru, O, C, and N, respectively. ....                                     | 24 |
| <b>Fig. S29.</b> Optimized geometry and gibbs free formation energy of NO decomposition reaction over Ir, Ru and their alloy surfaces at $T = 200\text{ }^{\circ}\text{C}$ and $P = 0.1\text{ MPa}$ . To calculate the formation energy, we used $\text{H}_2\text{O}$ , $\text{N}_2$ , $\text{CH}_4$ , and $\text{H}_2$ as standard electronic energies. Green, orange, red, and violet balls represent the Ir, Ru, O, and N, respectively.....                                             | 25 |
| <b>Fig. S30.</b> Optimized geometry and gibbs free formation energy of CO decomposition reaction over Ir, Ru and their alloy surfaces at $T = 200\text{ }^{\circ}\text{C}$ and $P = 0.1\text{ MPa}$ . To calculate the formation energy, we used $\text{H}_2\text{O}$ , $\text{N}_2$ , $\text{CH}_4$ , and $\text{H}_2$ as standard electronic energies. Green, orange, red, and brown balls represent the Ir, Ru, O, and C, respectively.....                                              | 26 |
| <b>Fig. S31.</b> Optimized geometry and gibbs free formation energy of $\text{NO}_2$ formation reaction over Ir, Ru and their alloy surfaces at $T = 200\text{ }^{\circ}\text{C}$ and $P = 0.1\text{ MPa}$ . To calculate the formation energy, we used $\text{H}_2\text{O}$ , $\text{N}_2$ ,                                                                                                                                                                                               |    |

CH<sub>4</sub>, and H<sub>2</sub> as standard electronic energies. Green, orange, red, and violet balls represent the Ir, Ru, O, and N, respectively. .... 27

**Fig. S32.** Optimized geometry and gibbs free formation energy of N<sub>2</sub> formation reaction over Ir, Ru and their alloy surfaces at  $T = 200$  °C and  $P = 0.1$  MPa . To calculate the formation energy, we used H<sub>2</sub>O, N<sub>2</sub>, CH<sub>4</sub>, and H<sub>2</sub> as standard electronic energies. Green, orange, red, and violet balls represent the Ir, Ru, O, and N, respectively. .... 28

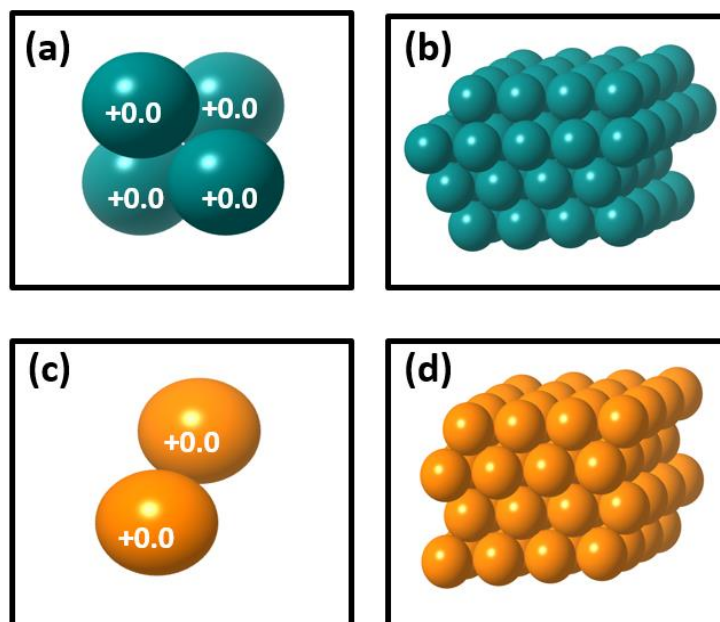

**Fig. S1.** Optimized geometry (a) Ir (111) primitive cell with bader charges (b) Ir<sub>64</sub> (111) supercell (c) Ru (001) primitive cell with bader charges and (d) Ru<sub>64</sub> (001) supercell. Green and orange balls represent the Ir and Ru, respectively.

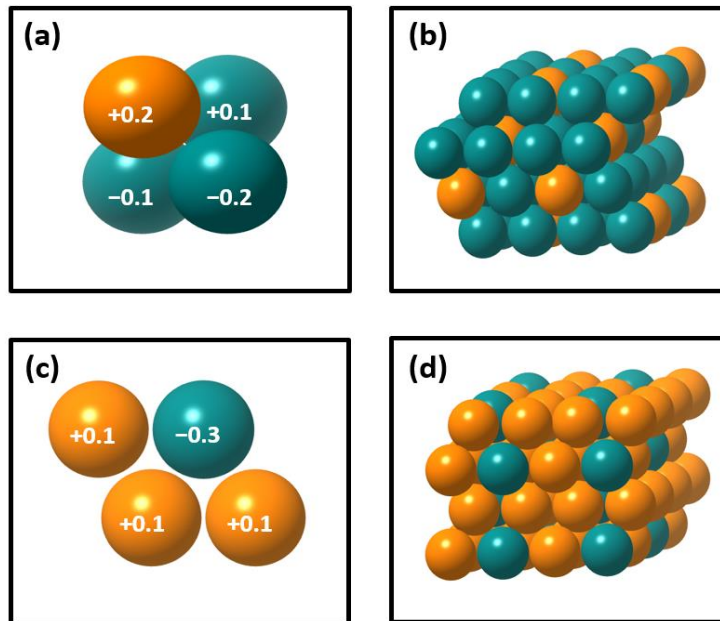

**Fig. S2.** Optimized bulk alloy models used for lattice parameter analysis (a) Ir<sub>3</sub>Ru<sub>1</sub> primitive cell with bader charges (b) Ir<sub>48</sub>Ru<sub>16</sub> supercell (c) Ru<sub>3</sub>Ir<sub>1</sub> primitive cell with bader charges (d) Ru<sub>48</sub>Ir<sub>16</sub> supercell. Green and orange balls represent the Ir and Ru, respectively.

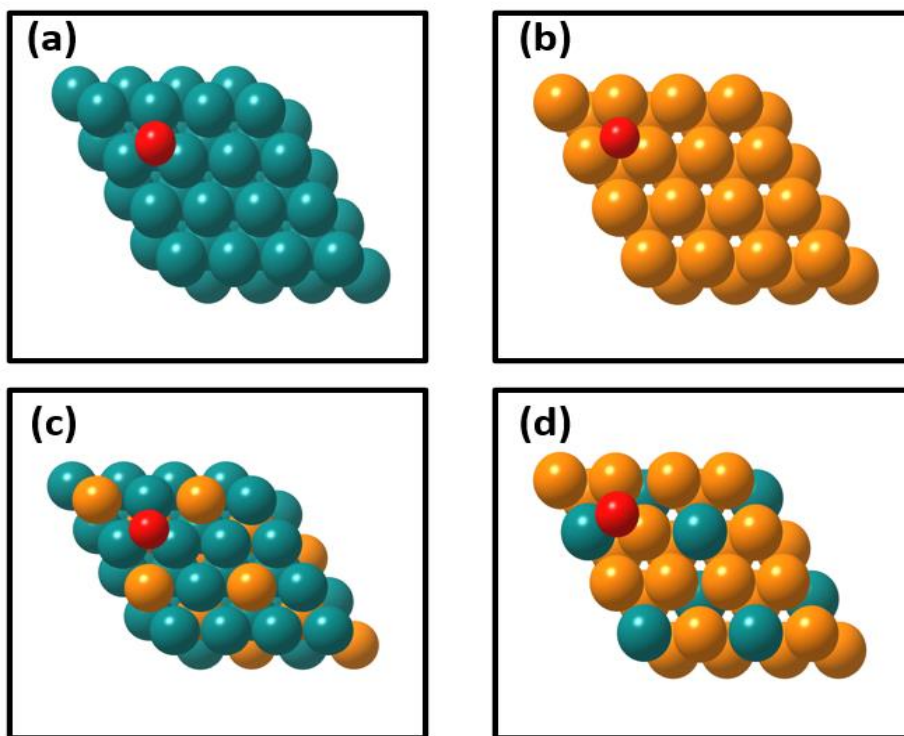

**Fig. S3.** Optimized bulk alloy slab models used for surface oxygen analysis. O\* was adsorbed on three fold hollow hcp site.(a)  $\text{Ir}_{64}\text{O}_1(111)$  super cell (b)  $\text{Ru}_{64}\text{O}_1(001)$  supercell (c)  $\text{Ir}_{48}\text{Ru}_{16}\text{O}_1(111)$  super cell (d)  $\text{Ru}_{48}\text{Ir}_{16}\text{O}_1$  supercell. Green, orange, and red balls represent the Ir, Ru, and oxygen, respectively.

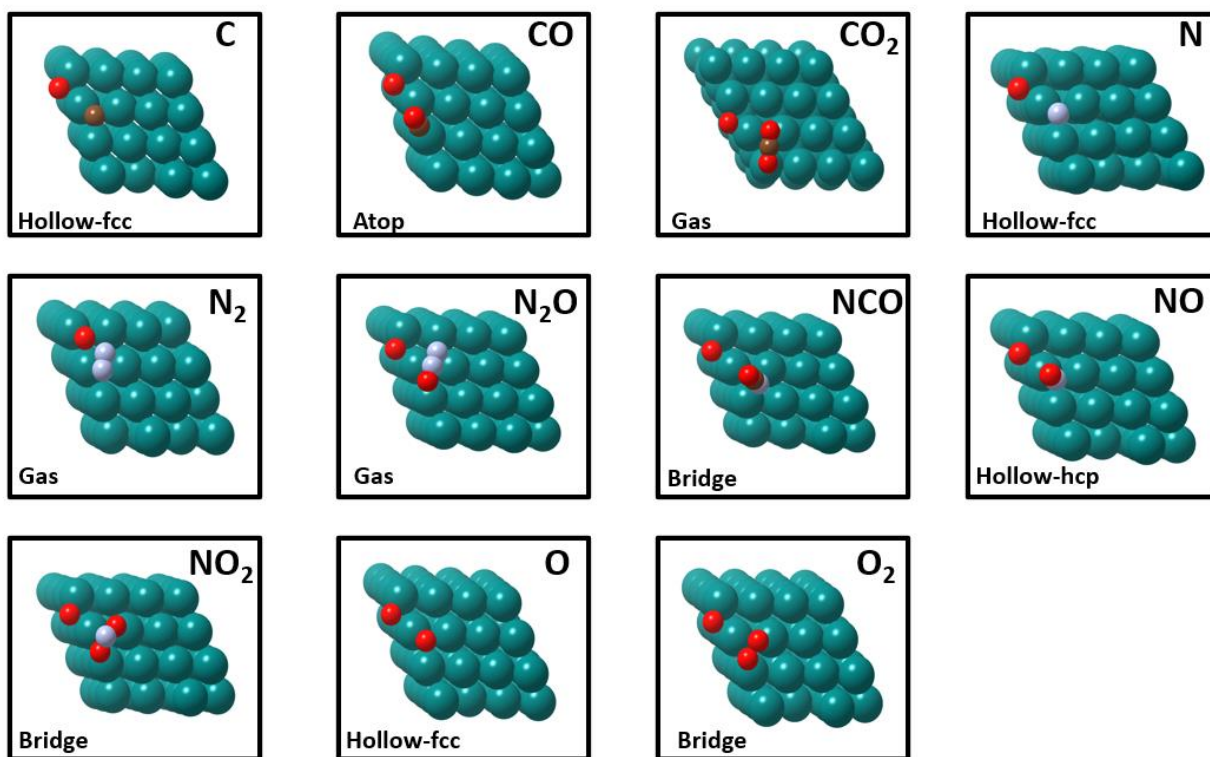

**Fig. S4.** Optimized surface oxygen Ir-slab model with different adsorbates at their stable sites. O\* was adsorbed on hcp hollow site and most stable site of each adsorbate is mention under each figure. Green, red, brown, and violet balls represent the Ir, O, C, and N, respectively.

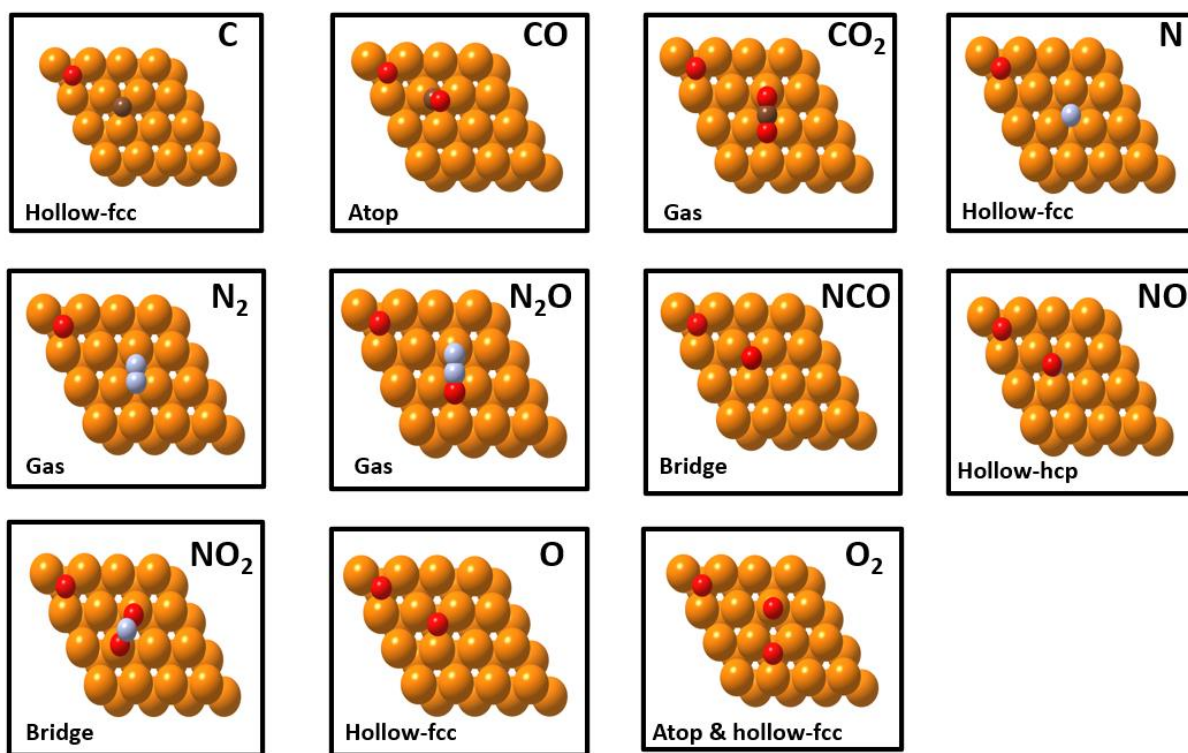

**Fig. S5.** Optimized surface oxygen Ru-slab model with different adsorbates at their stable sites. O\* was adsorbed on hcp hollow site and most stable site of each adsorbate is mention under each figure. Orange, red, brown, and violet balls represent the Ru, O, C, and N, respectively.



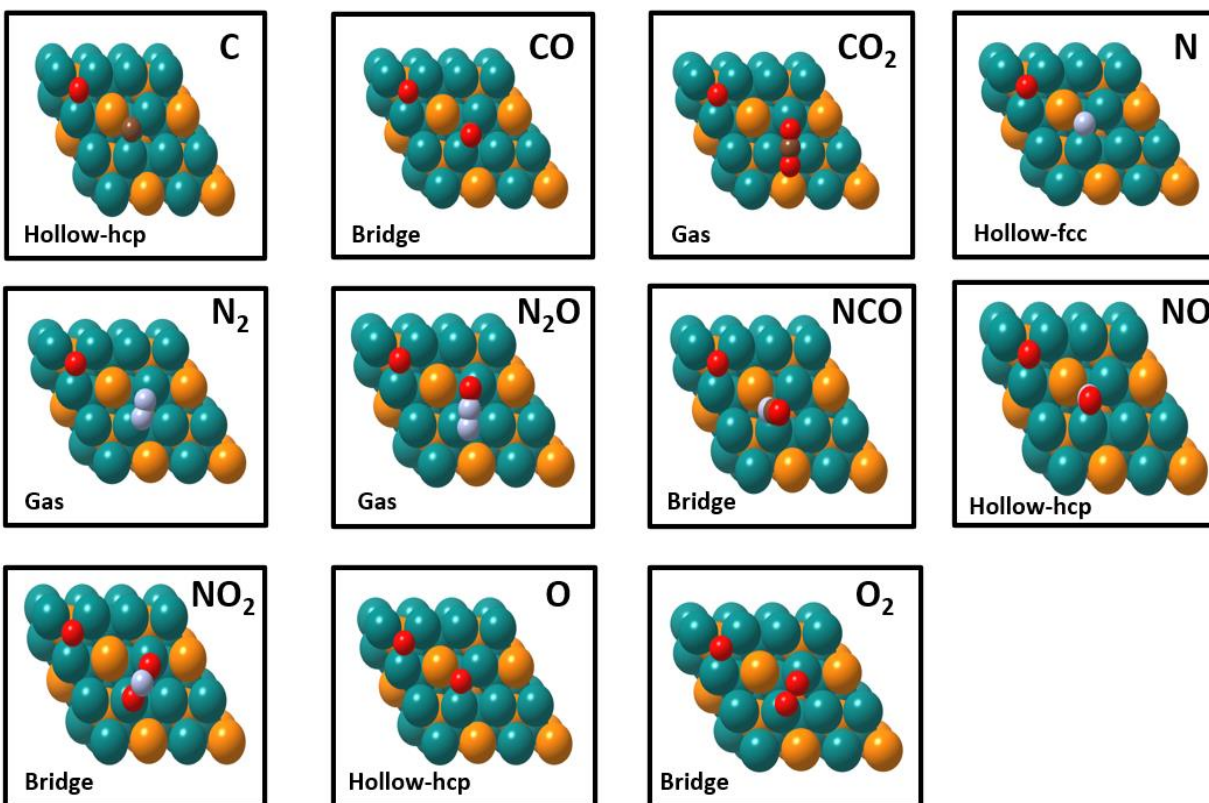

**Fig. S6.** Optimized surface oxygen Ir<sub>3</sub>Ru<sub>1</sub>-slab model with different adsorbates at their stable sites. O\* was adsorbed on hcp hollow site and most stable site of each adsorbate is mention under each figure. Green, orange, red, brown, and violet balls represent the Ir, Ru, O, C, and N, respectively.

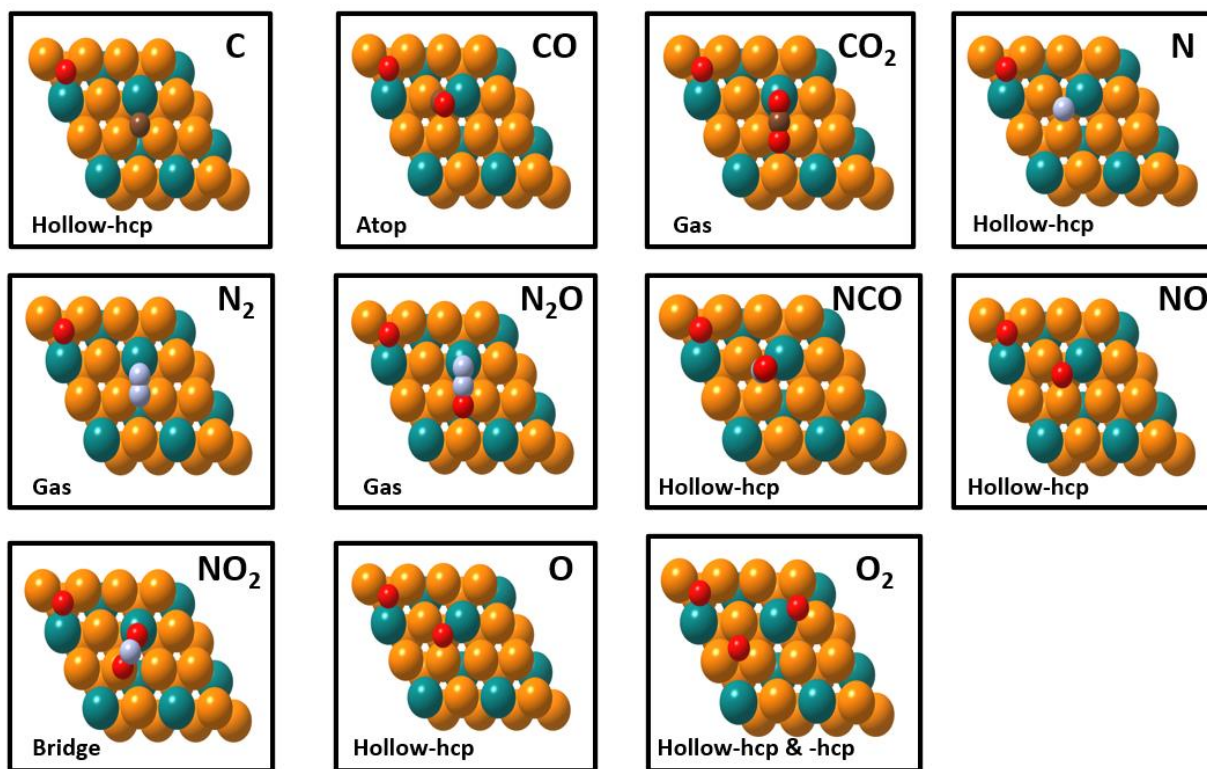

**Fig. S7.** Optimized surface oxygen Ru<sub>3</sub>Ir<sub>1</sub>-slab model with different adsorbates at their stable sites. O\* was adsorbed on hcp hollow site and most stable site of each adsorbate is mention under each figure. Green, orange, red, brown, and violet balls represent the Ir, Ru, O, C, and N, respectively.

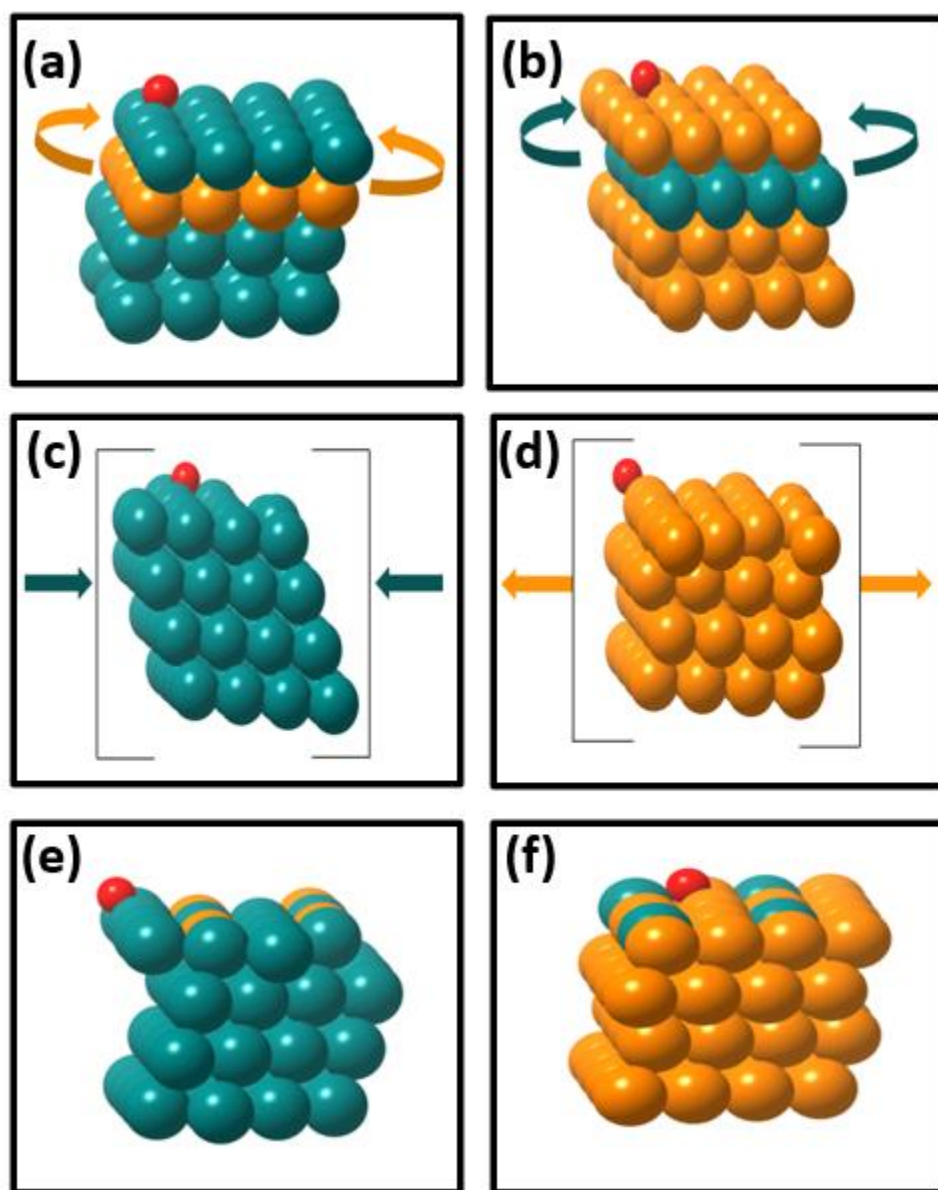

**Fig. S8.** Optimized surface oxygen slab models used for dominant effect study (a) Ir-Ru<sub>ligand</sub> (b) Ru-Ir<sub>ligand</sub> (c) Ir compressive strain (d) Ru tensile strain (e) Ir-Ru<sub>ensemble</sub> (f) Ru-Ir<sub>ensemble</sub> models. Green, orange, and red balls represent the Ir, Ru, and O, respectively.

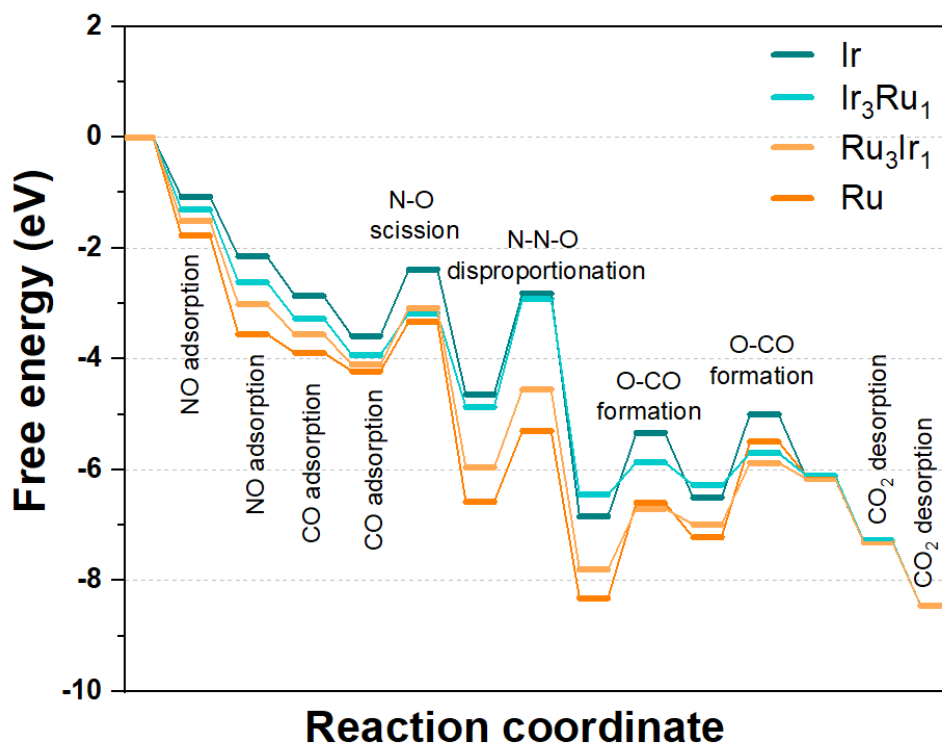

**Fig. S9.** Reaction energy profile, NO+CO reactions.  $T = 150\text{ }^{\circ}\text{C}$  and  $P = 0.1\text{ MPa}$

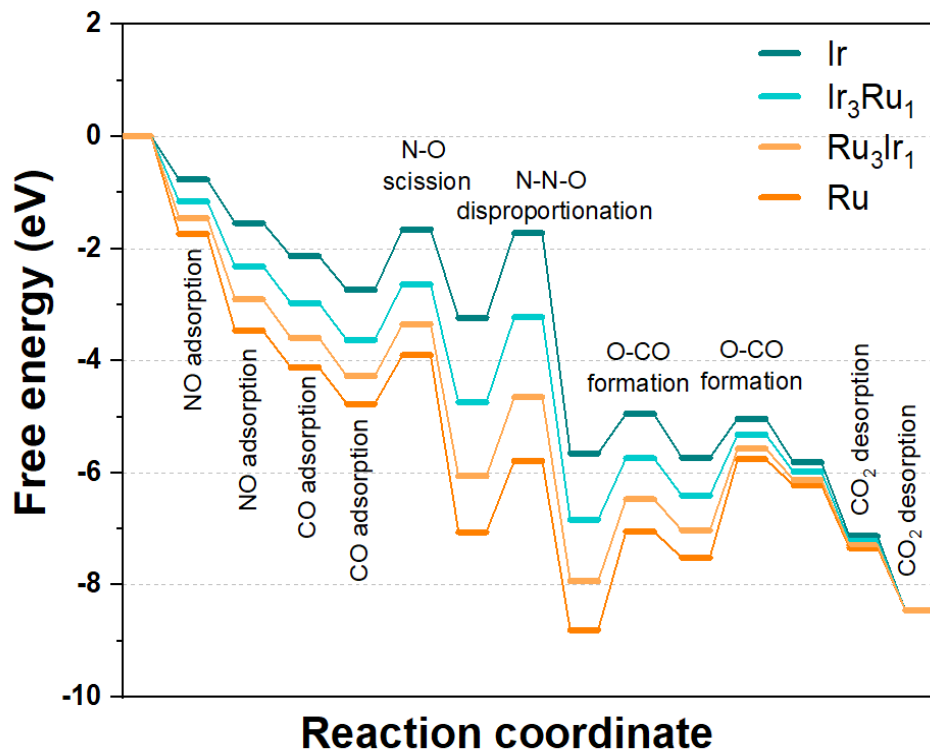

**Fig. S10.** Reaction energy profile, NO+CO+O<sub>2</sub> reactions.  $T = 150\text{ }^{\circ}\text{C}$  and  $P = 0.1\text{ MPa}$

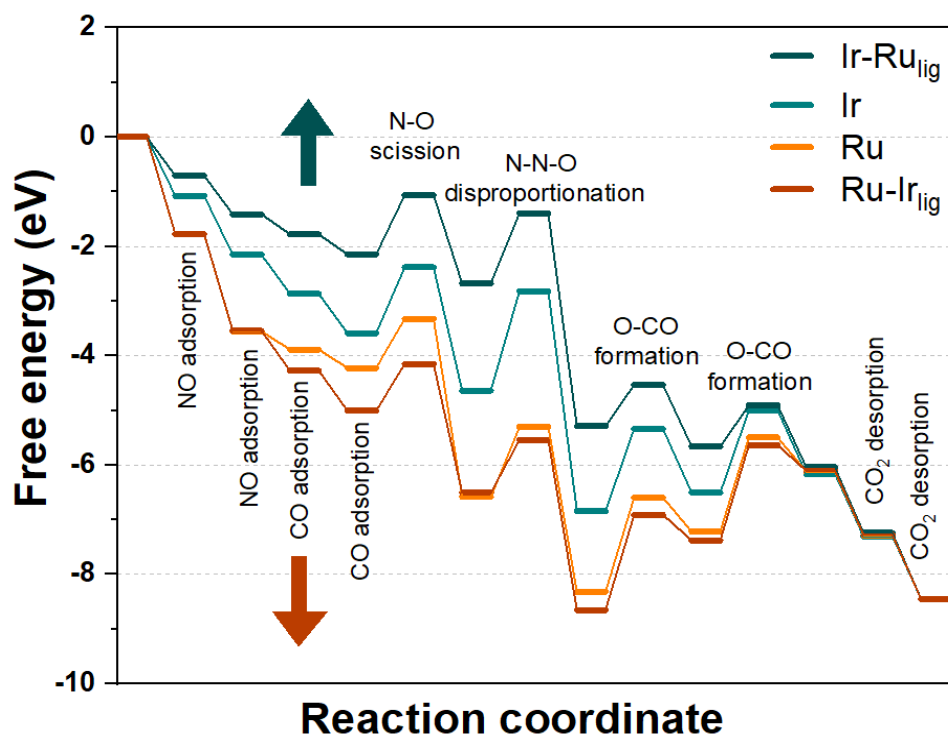

**Fig. S11.** Reaction energy profile of ligand effect without surface oxygen.  $T = 150\text{ }^\circ\text{C}$  and  $P = 0.1\text{ MPa}$

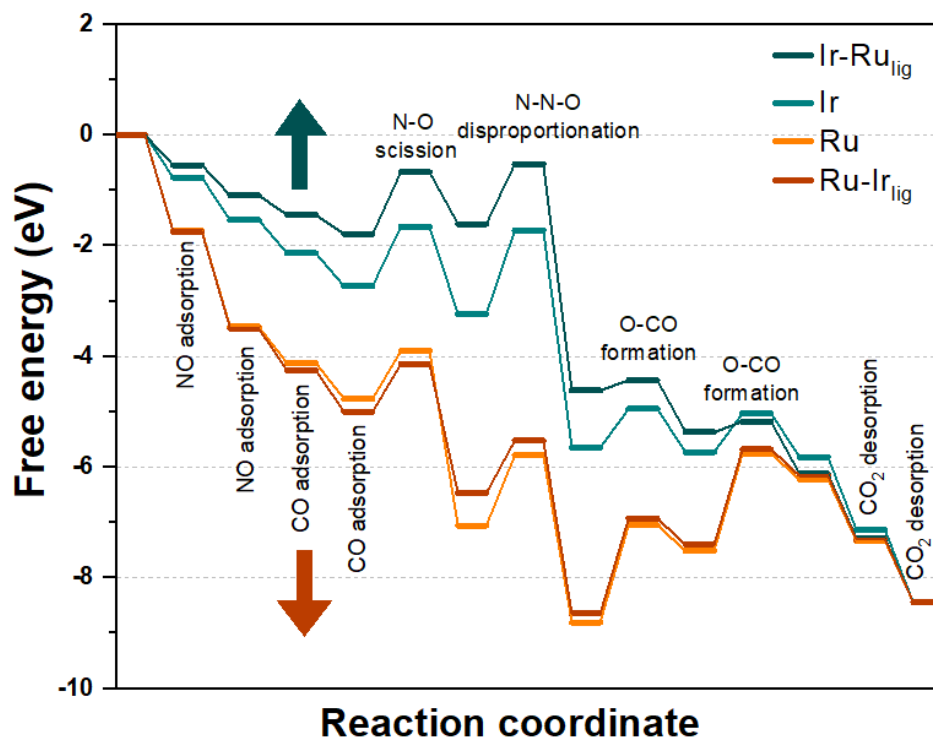

**Fig. S12.** Reaction energy profile of ligand effect with surface oxygen.  $T = 150\text{ }^\circ\text{C}$  and  $P = 0.1\text{ MPa}$

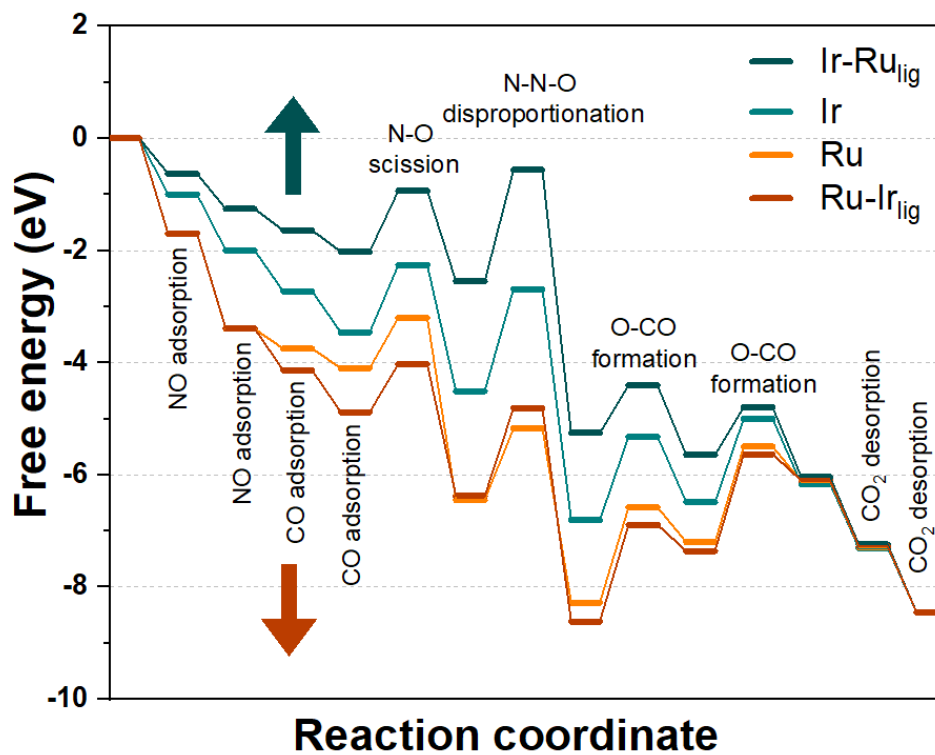

**Fig. S13.** Reaction energy profile of ligand effect without surface oxygen.  
 $T = 200\text{ }^{\circ}\text{C}$  and  $P = 0.1\text{ MPa}$

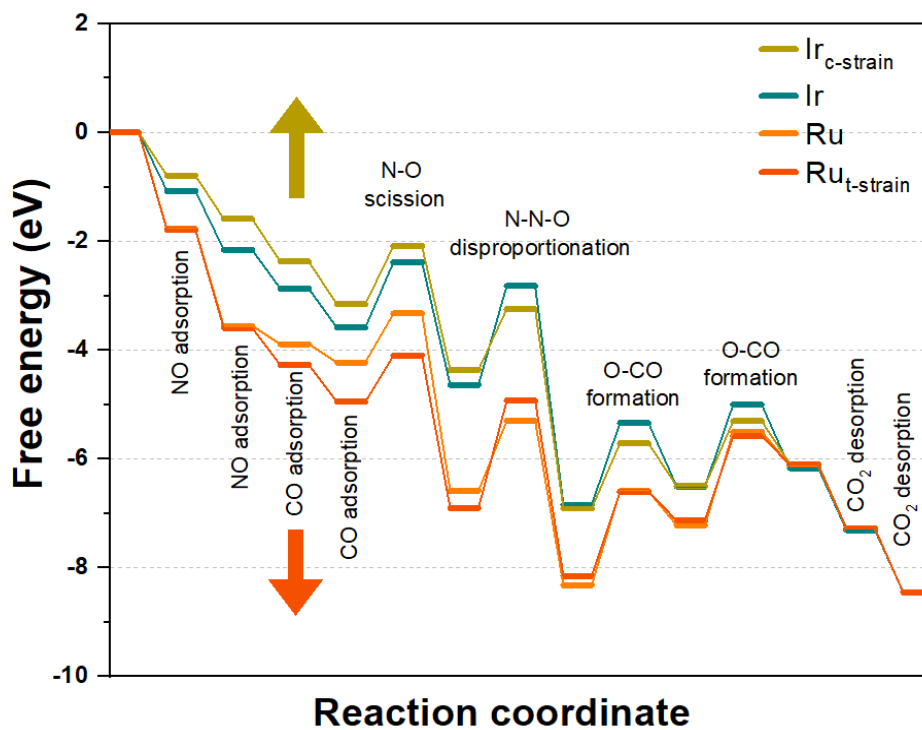

**Fig. S14.** Reaction energy profile of strain effect without surface oxygen.  
 $T = 150\text{ }^{\circ}\text{C}$  and  $P = 0.1\text{ MPa}$

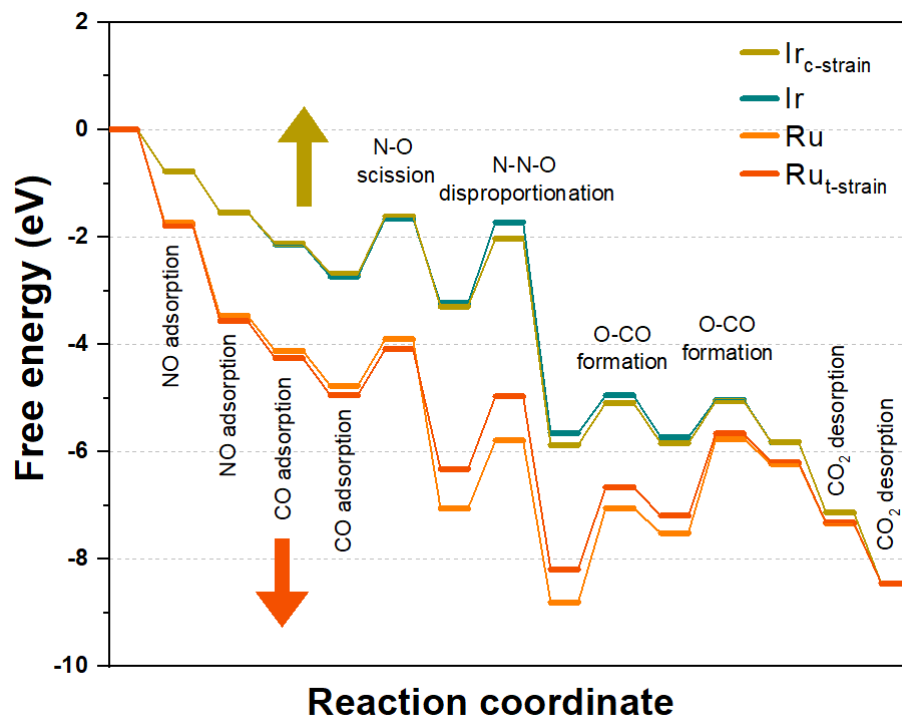

**Fig. S15.** Reaction energy profile of strain effect with surface oxygen.  
 $T = 150\text{ }^\circ\text{C}$  and  $P = 0.1\text{ MPa}$

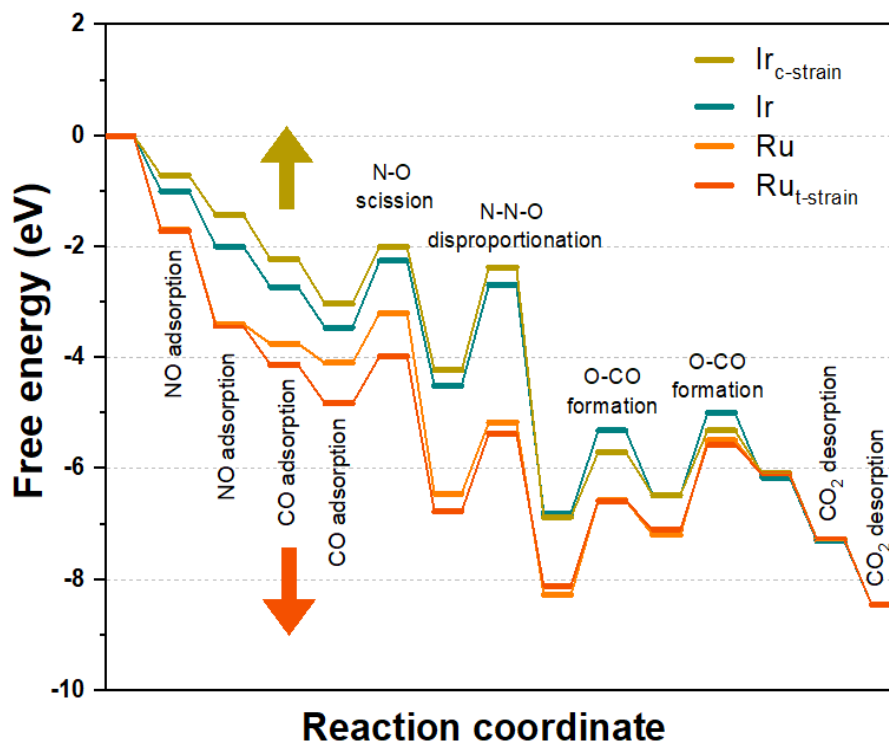

**Fig. S16.** Reaction energy profile of strain effect without surface oxygen.  
 $T = 200\text{ }^\circ\text{C}$  and  $P = 0.1\text{ MPa}$

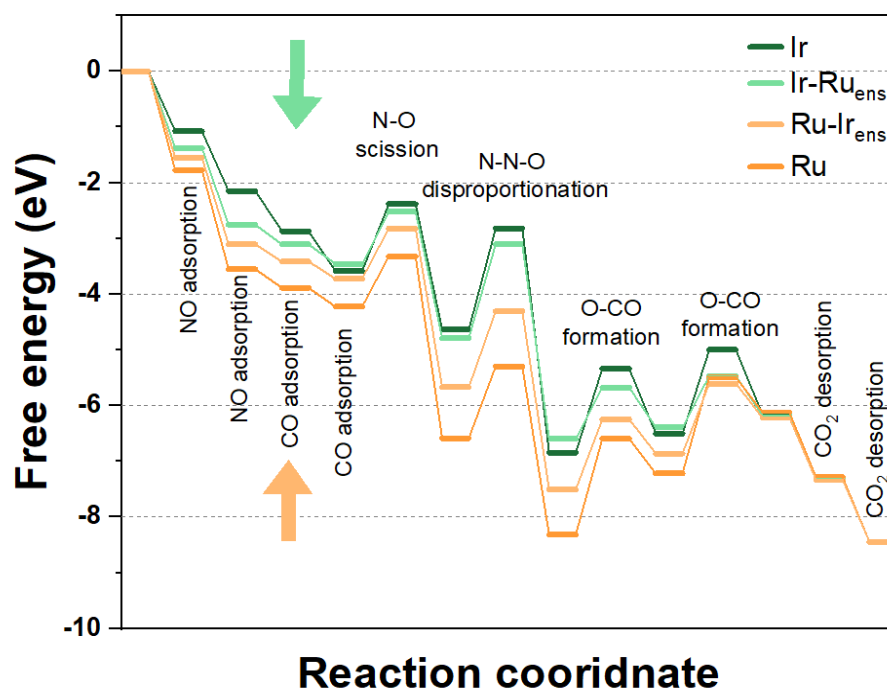

**Fig. S17.** Reaction energy profile of dominant effect in an IrRu alloy formation without surface oxygen.  $T = 150\text{ }^{\circ}\text{C}$  and  $P = 0.1\text{ MPa}$

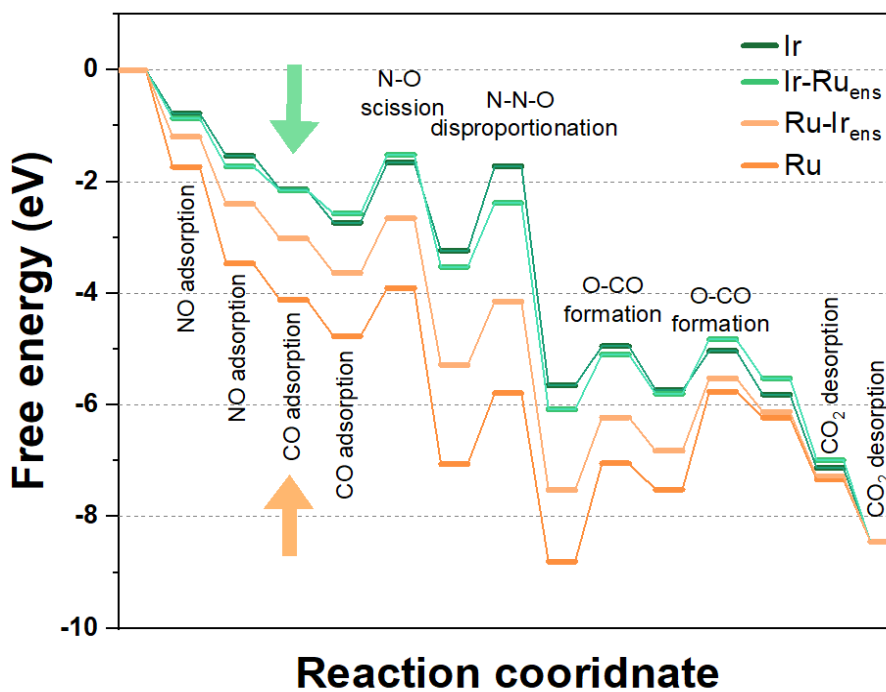

**Fig. S18.** Reaction energy profile of dominant effect in an IrRu alloy formation with surface oxygen.  $T = 150\text{ }^{\circ}\text{C}$  and  $P = 0.1\text{ MPa}$



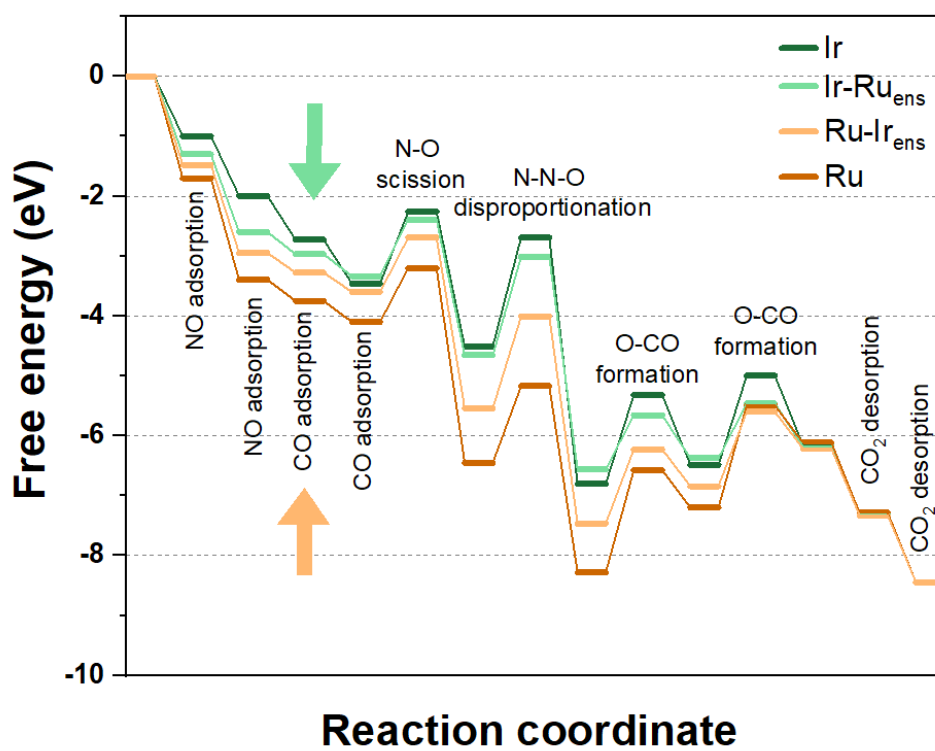

**Fig. S19.** Reaction energy profile of dominant effect in an IrRu alloy formation without surface oxygen.  $T = 200$  °C and  $P = 0.1$  MPa

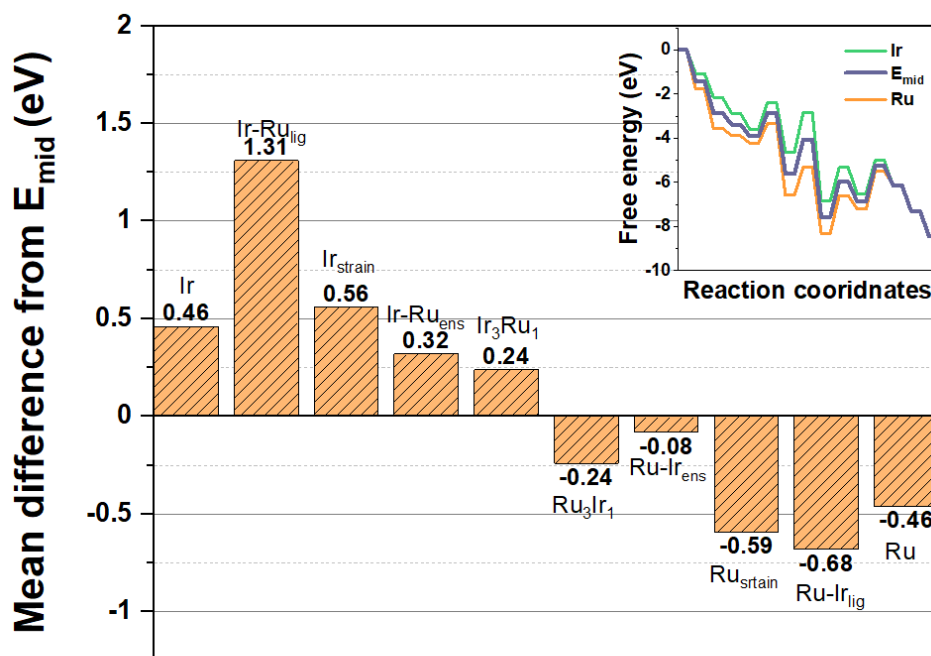

### Catalytic models

Fig. S20. Mean difference between the median values ( $E_{mid}$ ) of the pure Ir and Ru catalysts and the energy values of the different alloy surfaces without surface oxygen.  $T = 150\text{ }^{\circ}\text{C}$  and  $P = 0.1\text{ MPa}$

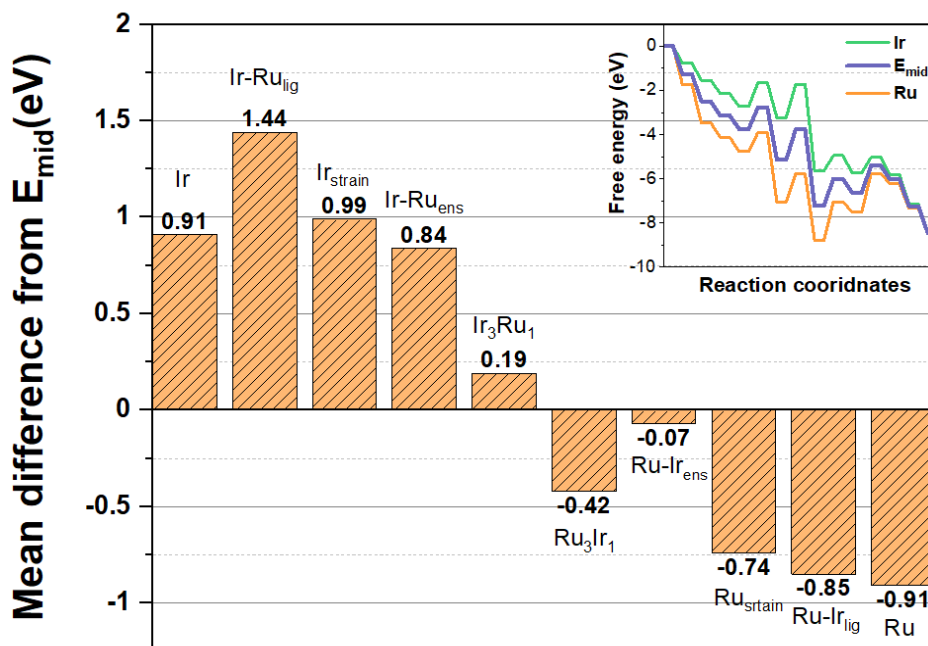

### Catalytic models

Fig. S21. Mean difference between the median values ( $E_{mid}$ ) of the pure Ir and Ru catalysts and the energy values of the different alloy surfaces with surface oxygen.  $T = 150\text{ }^{\circ}\text{C}$  and  $P = 0.1\text{ MPa}$

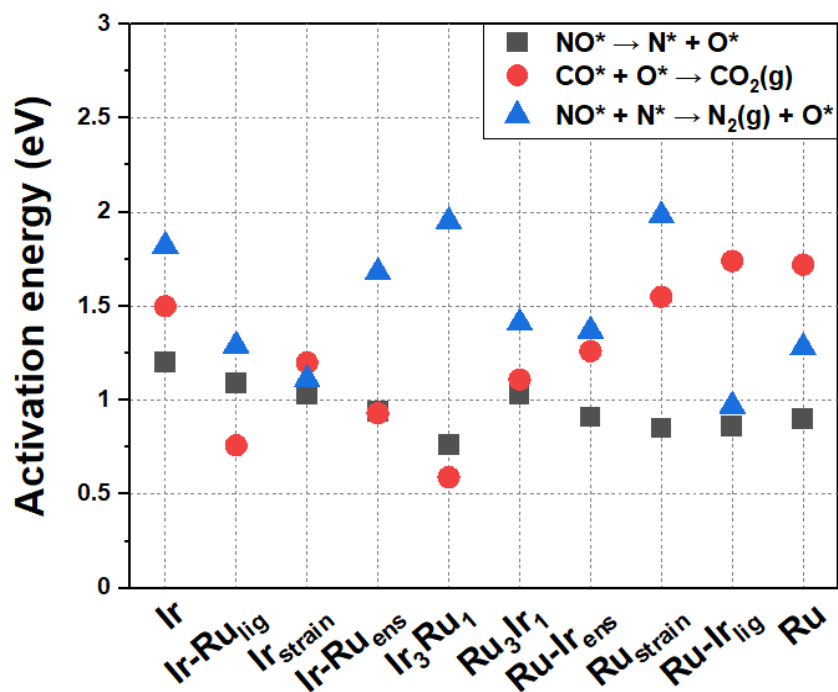

Fig. S22. Activation energy ( $E_a$ ) trends for three important reactions among the different catalytic models without surface oxygen for different catalytic models.  $T = 150\text{ }^\circ\text{C}$  and  $P = 0.1\text{ MPa}$

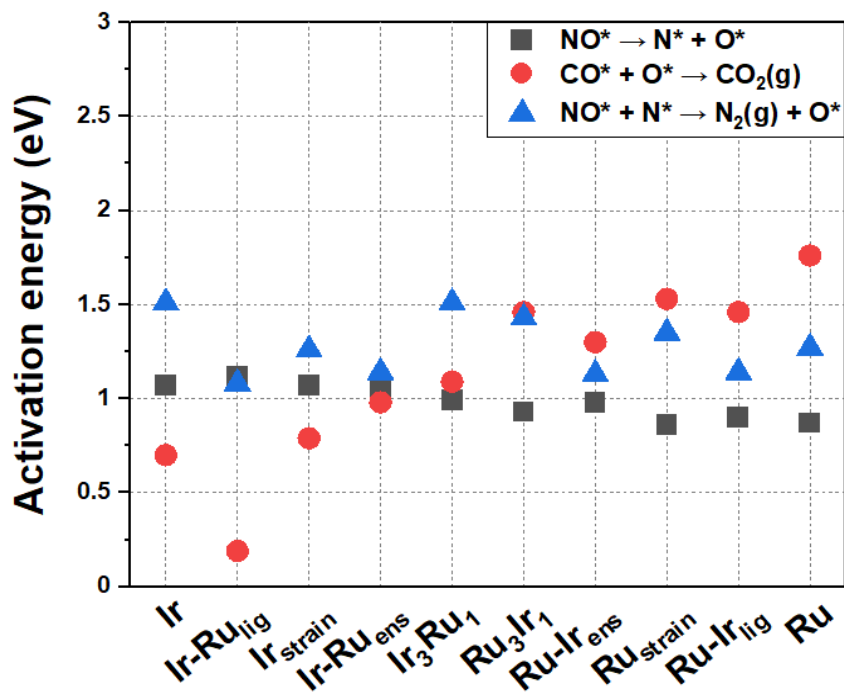

Fig. S23. Activation energy ( $E_a$ ) trends for three important reactions among the different catalytic models with surface oxygen for different catalytic models.  $T = 150\text{ }^\circ\text{C}$  and  $P = 0.1\text{ MPa}$

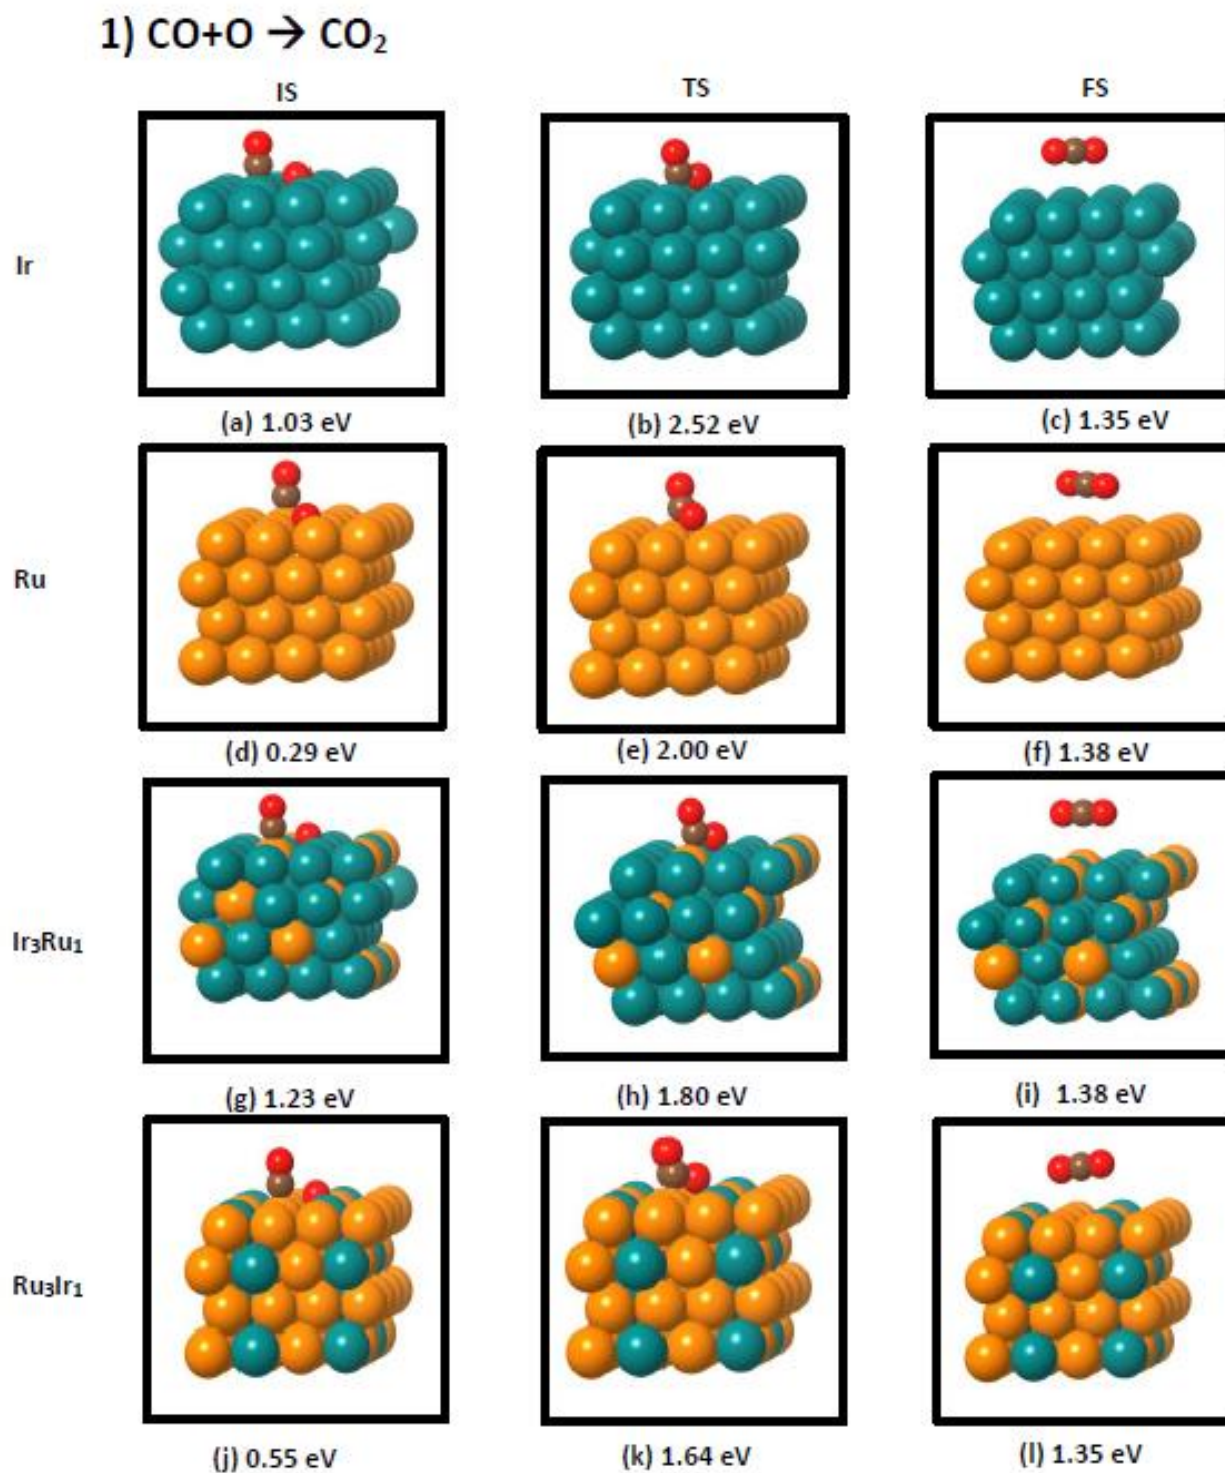

**Fig. S24.** Optimized geometry and gibbs free formation energy of CO oxidation reaction over Ir, Ru and their alloy surfaces at  $T = 200^\circ\text{C}$  and  $P = 0.1\text{ MPa}$ . To calculate the formation energy, we used  $\text{H}_2\text{O}$ ,  $\text{N}_2$ ,  $\text{CH}_4$ , and  $\text{H}_2$  as standard electronic energies. Green, orange, red, and brown balls represent the Ir, Ru, O, and C, respectively.

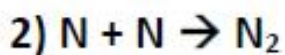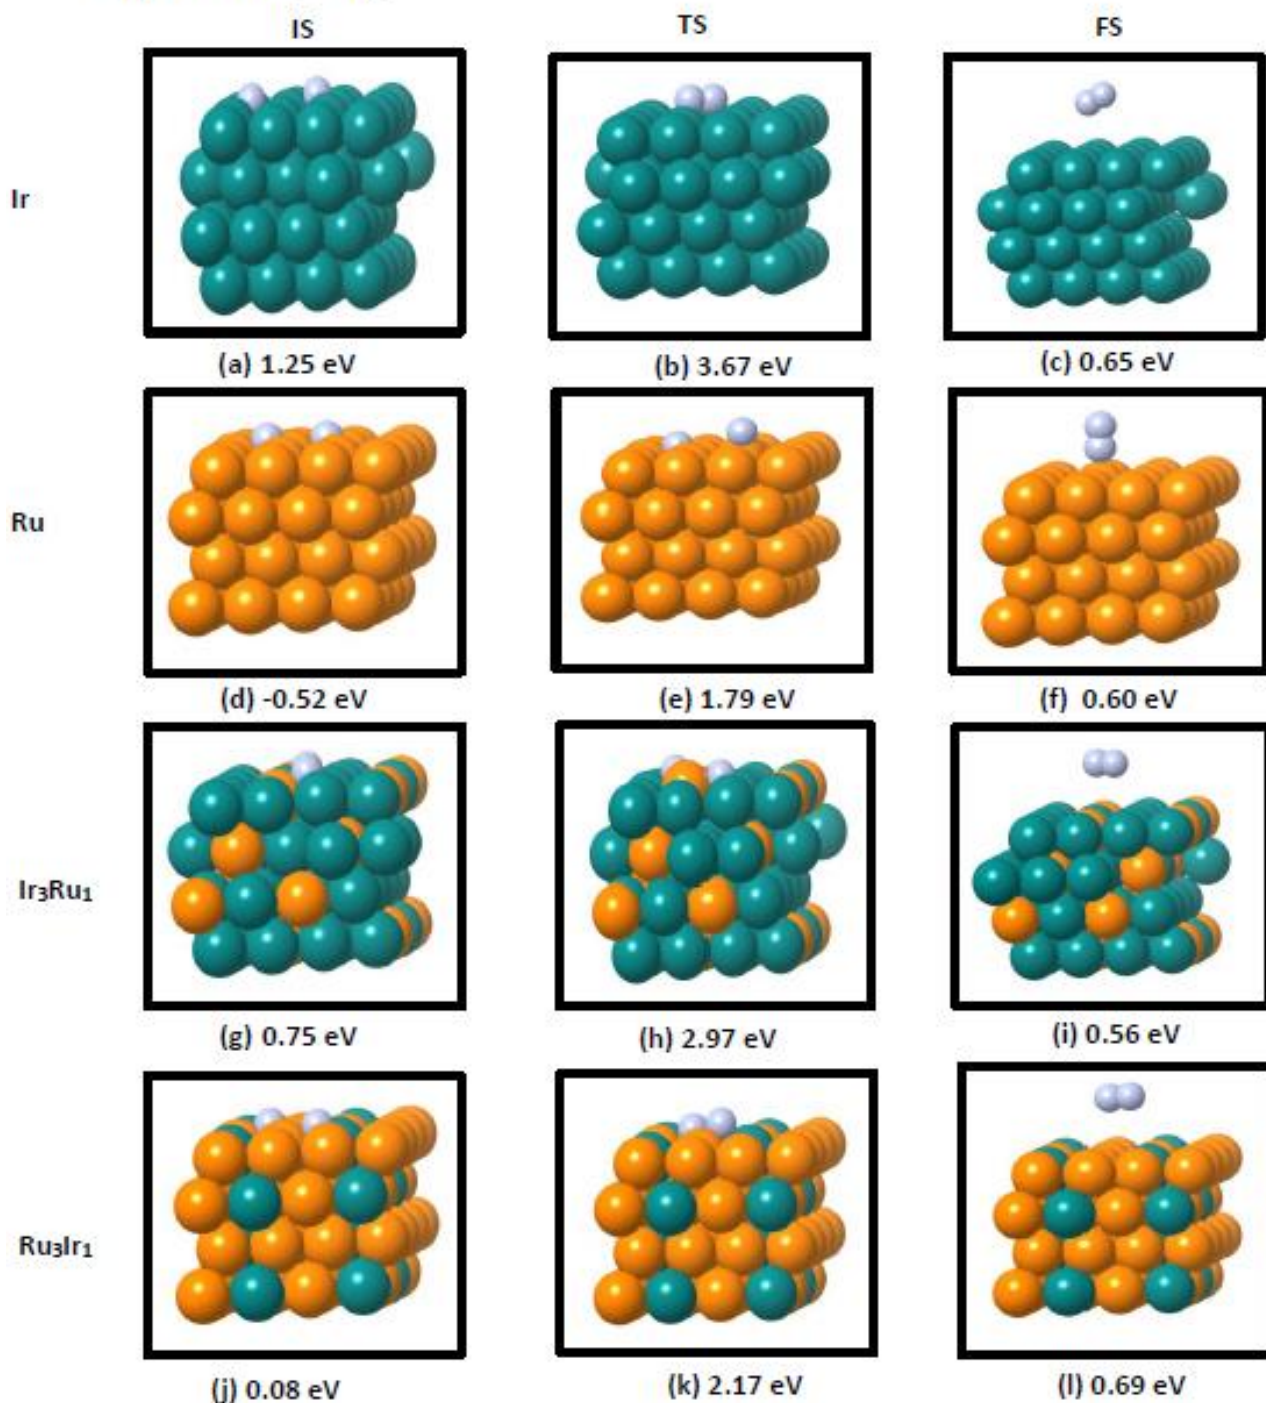

**Fig. S25.** Optimized geometry and gibbs free formation energy of  $N_2$  formation via N–N recombination over Ir, Ru and their alloy surfaces at  $T = 200$  °C and  $P = 0.1$  MPa . To calculate the formation energy, we used  $H_2O$ ,  $N_2$ ,  $CH_4$ , and  $H_2$  as standard electronic energies. Green, orange, and violet balls represent the Ir, Ru, and N, respectively.

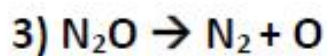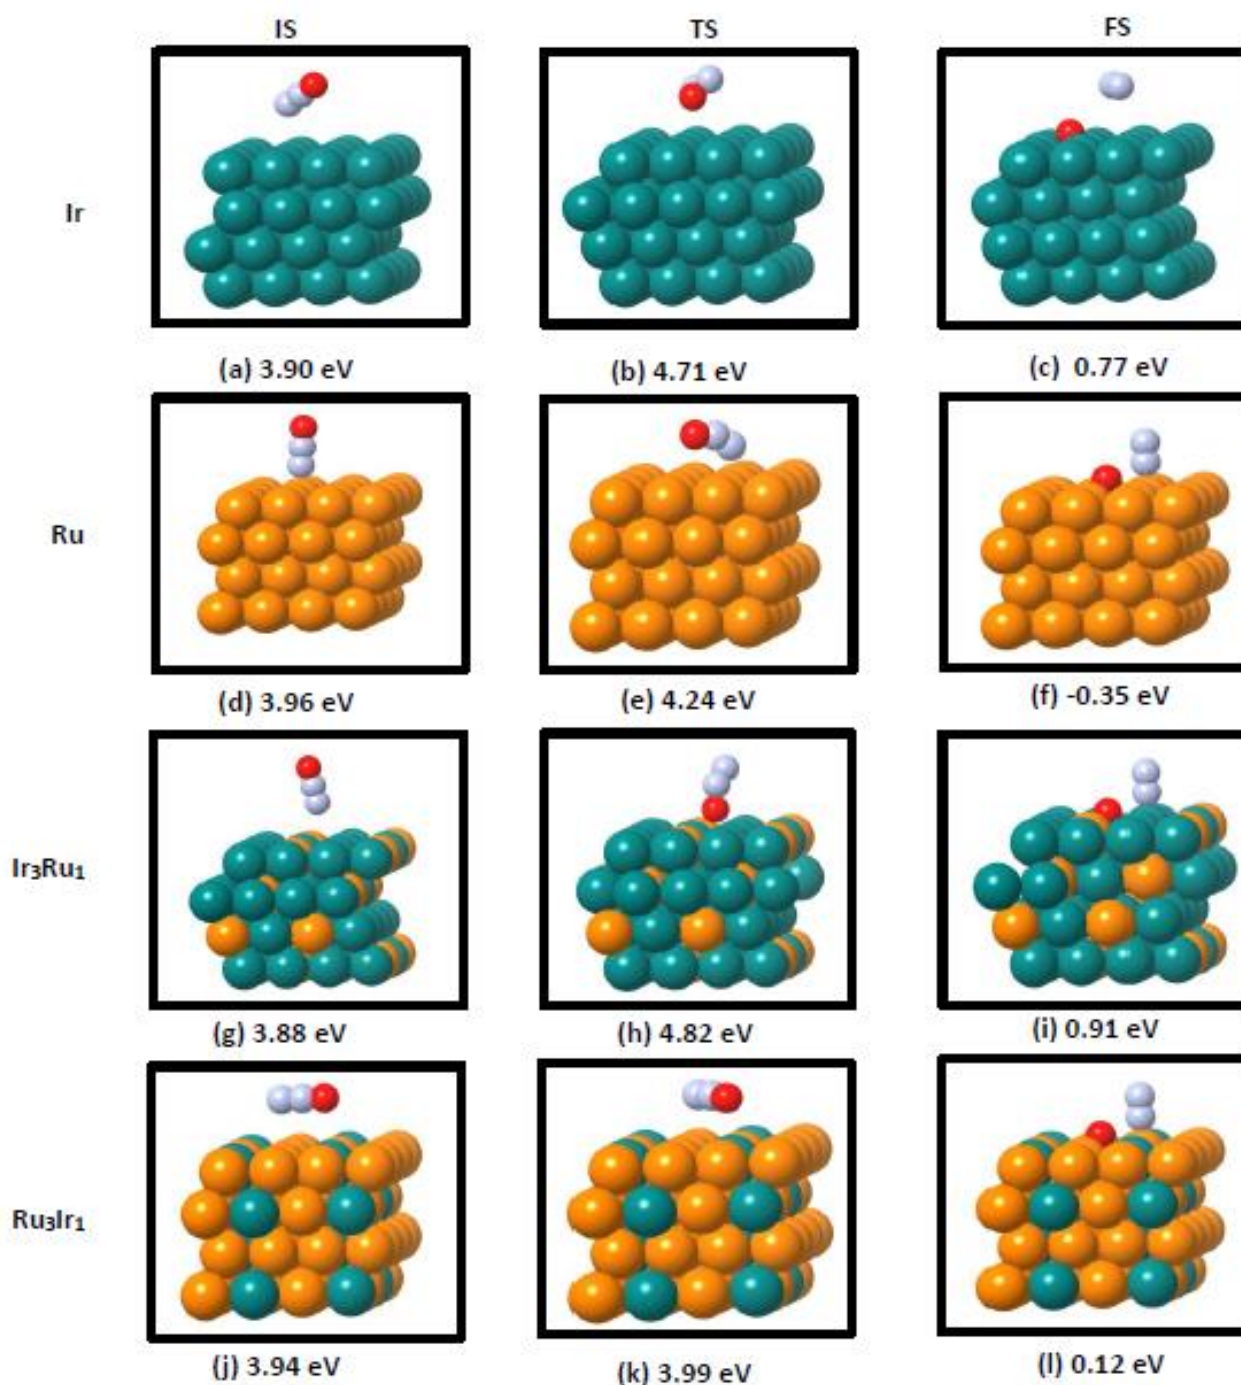

**Fig. S26.** Optimized geometry and gibbs free formation energy of  $\text{N}_2\text{O}$  decomposition in  $\text{N}_2$  formation reaction over Ir, Ru and their alloy surfaces at  $T = 200\text{ }^\circ\text{C}$  and  $P = 0.1\text{ MPa}$ . To calculate the formation energy, we used  $\text{H}_2\text{O}$ ,  $\text{N}_2$ ,  $\text{CH}_4$ , and  $\text{H}_2$  as standard electronic energies. Green, orange, red, and violet balls represent the Ir, Ru, O, and N, respectively.

#### 4) $\text{NO} + \text{N} \rightarrow \text{N}_2\text{O}$

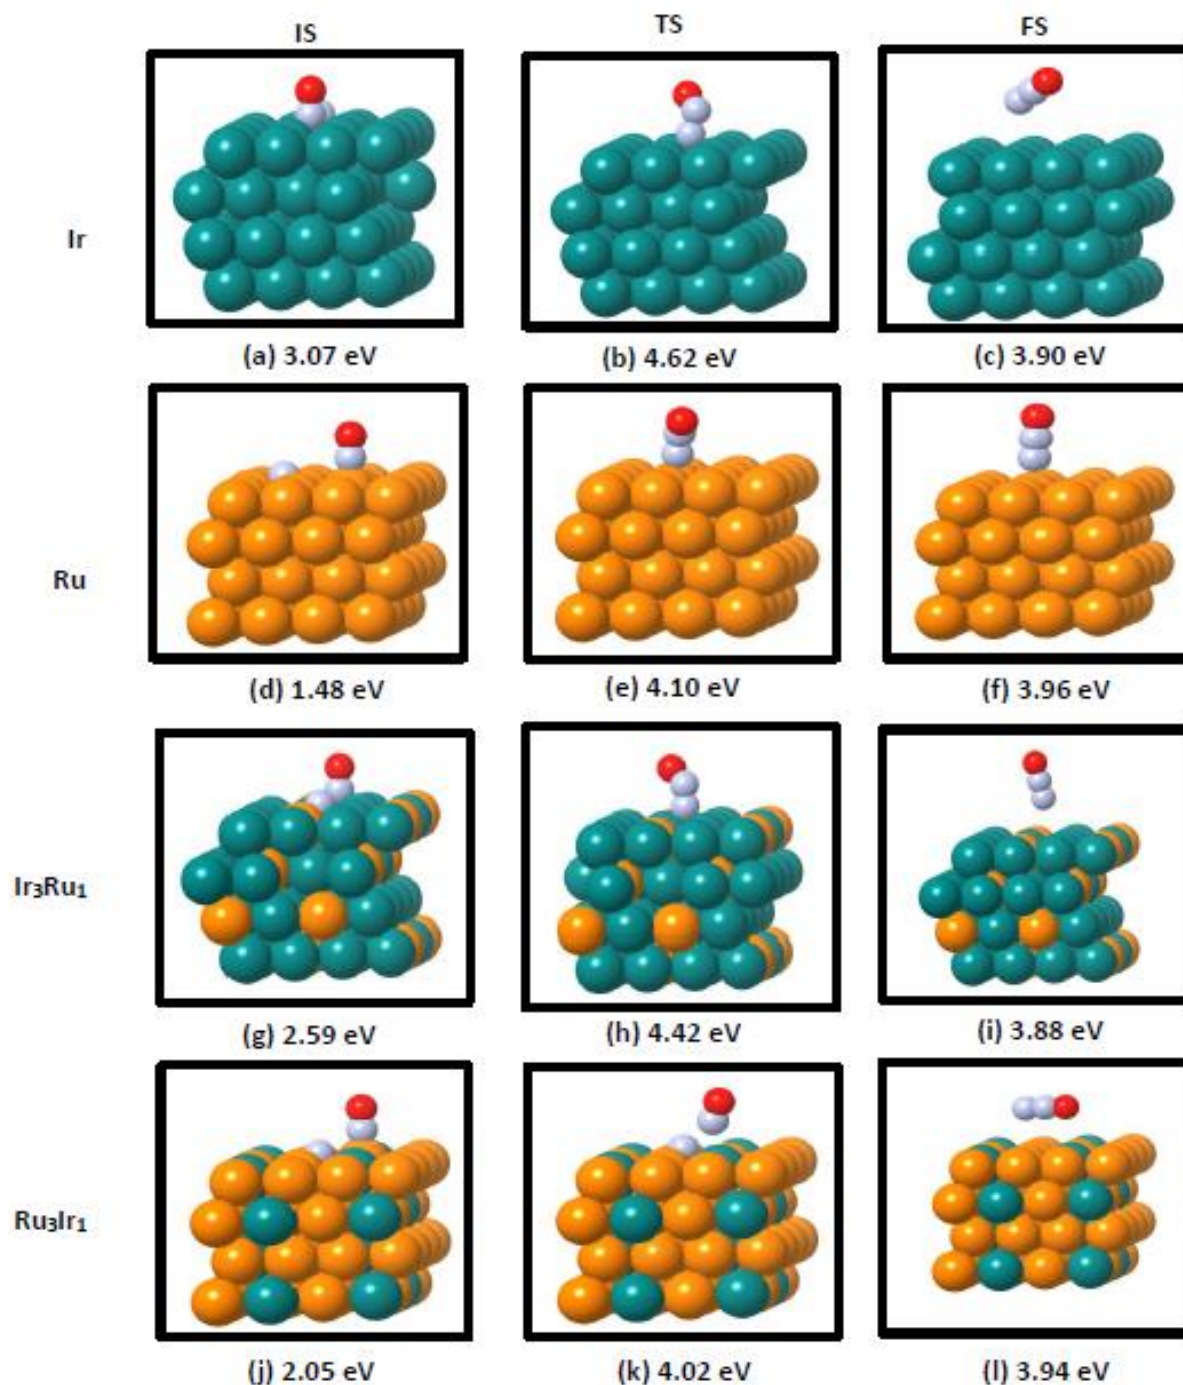

**Fig. S27.** Optimized geometry and gibbs free formation energy of  $\text{N}_2\text{O}$  formation reaction over Ir, Ru and their alloy surfaces at  $T = 200\text{ }^\circ\text{C}$  and  $P = 0.1\text{ MPa}$ . To calculate the formation energy, we used  $\text{H}_2\text{O}$ ,  $\text{N}_2$ ,  $\text{CH}_4$ , and  $\text{H}_2$  as standard electronic energies. Green, orange, red, and violet balls represent the Ir, Ru, O, and N, respectively.

5)  $\text{N} + \text{CO} \rightarrow \text{NCO}$

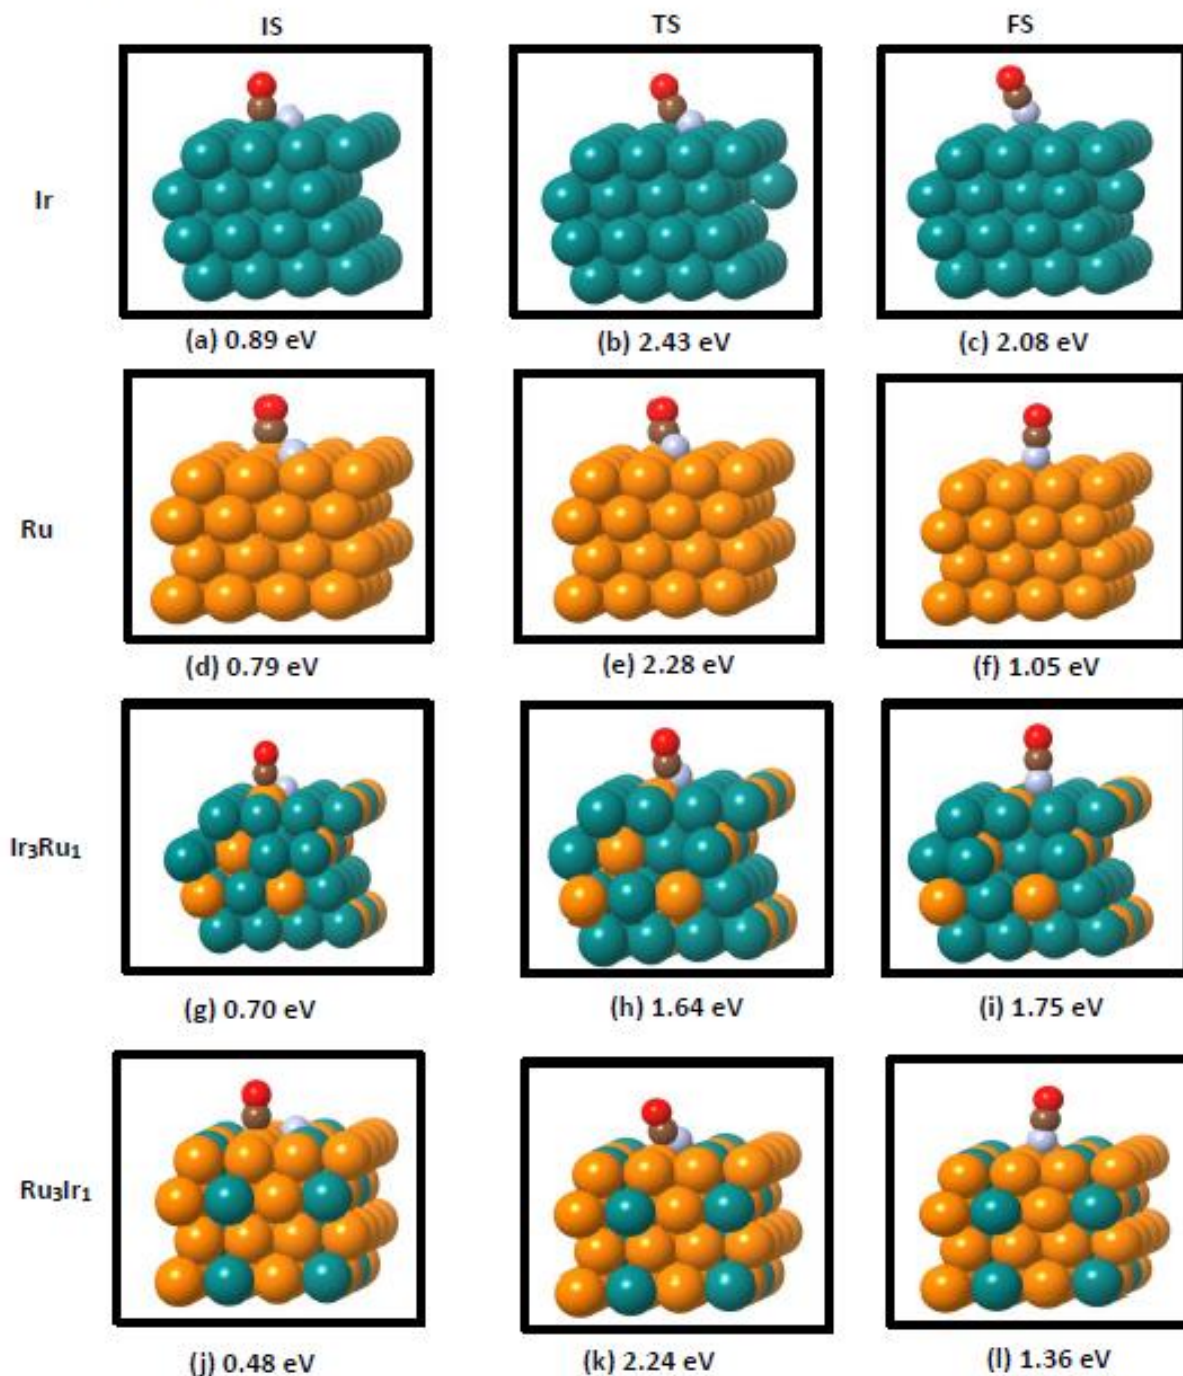

**Fig. S28.** Optimized geometry and gibbs free formation energy of NCO formation reaction over Ir, Ru and their alloy surfaces at  $T = 200\text{ }^\circ\text{C}$  and  $P = 0.1\text{ MPa}$ . To calculate the formation energy, we used  $\text{H}_2\text{O}$ ,  $\text{N}_2$ ,  $\text{CH}_4$ , and  $\text{H}_2$  as standard electronic energies. Green, orange, red, brown, and violet balls represent the Ir, Ru, O, C, and N, respectively.



6)  $\text{NO} \rightarrow \text{N} + \text{O}$

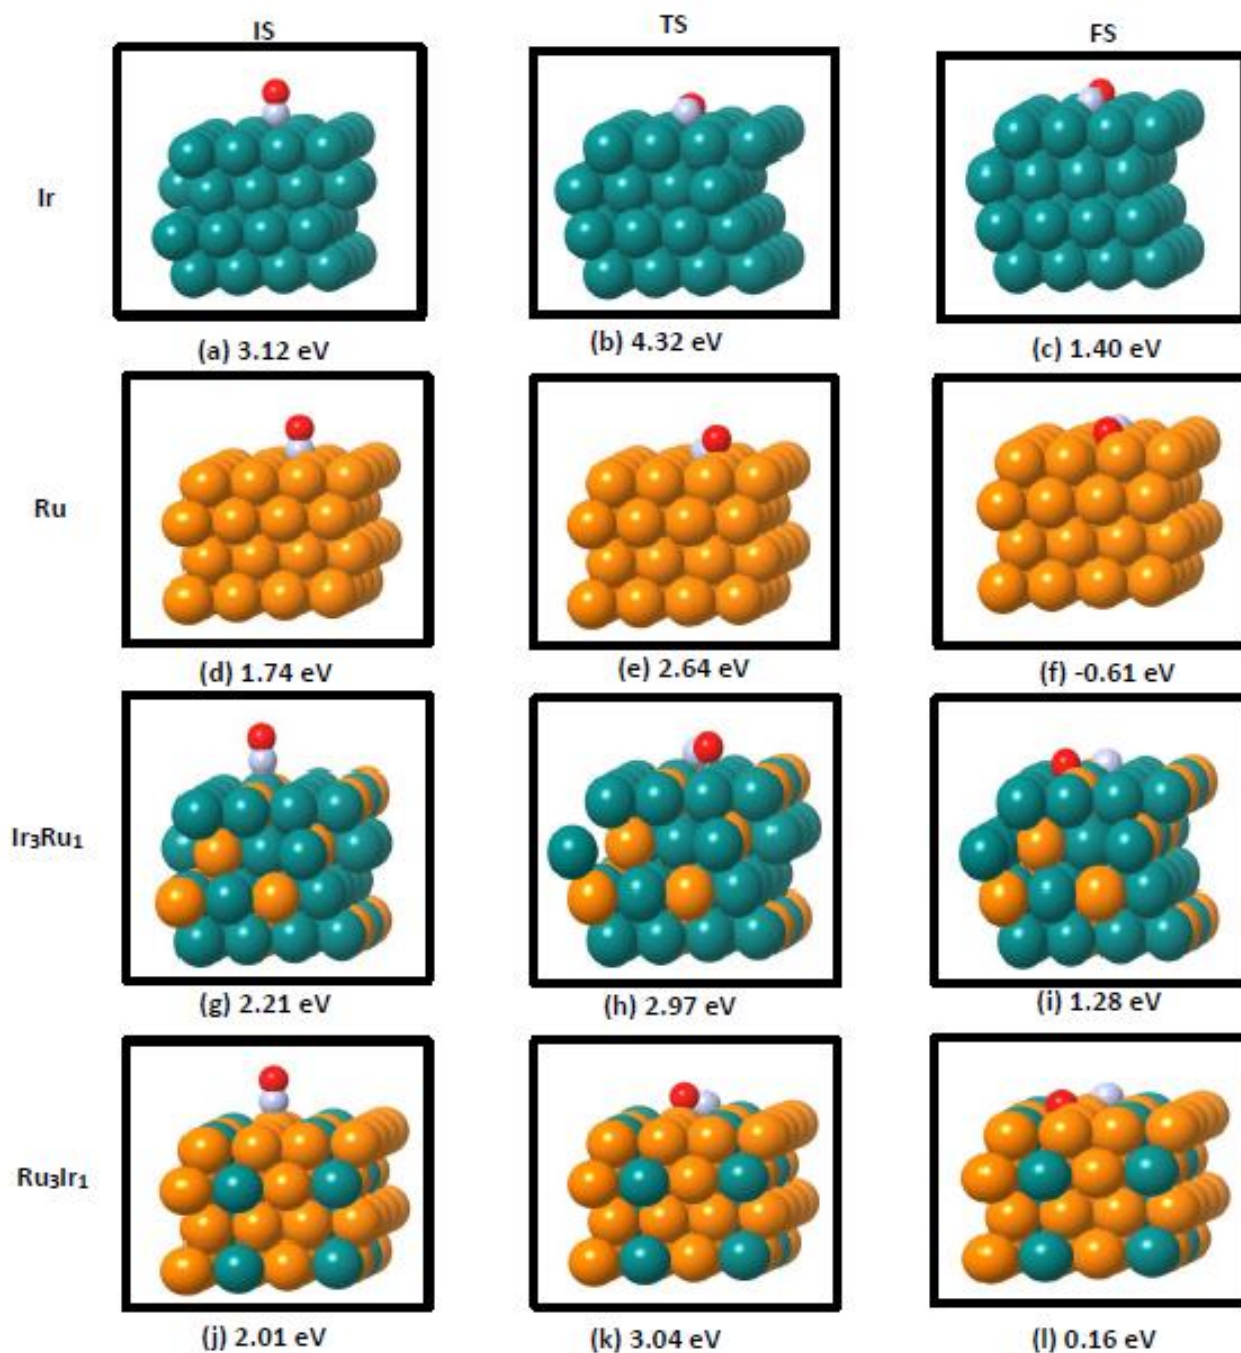

**Fig. S29.** Optimized geometry and gibbs free formation energy of NO decomposition reaction over Ir, Ru and their alloy surfaces at  $T = 200 \text{ }^\circ\text{C}$  and  $P = 0.1 \text{ MPa}$ . To calculate the formation energy, we used  $\text{H}_2\text{O}$ ,  $\text{N}_2$ ,  $\text{CH}_4$ , and  $\text{H}_2$  as standard electronic energies. Green, orange, red, and violet balls represent the Ir, Ru, O, and N, respectively.

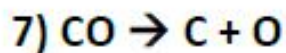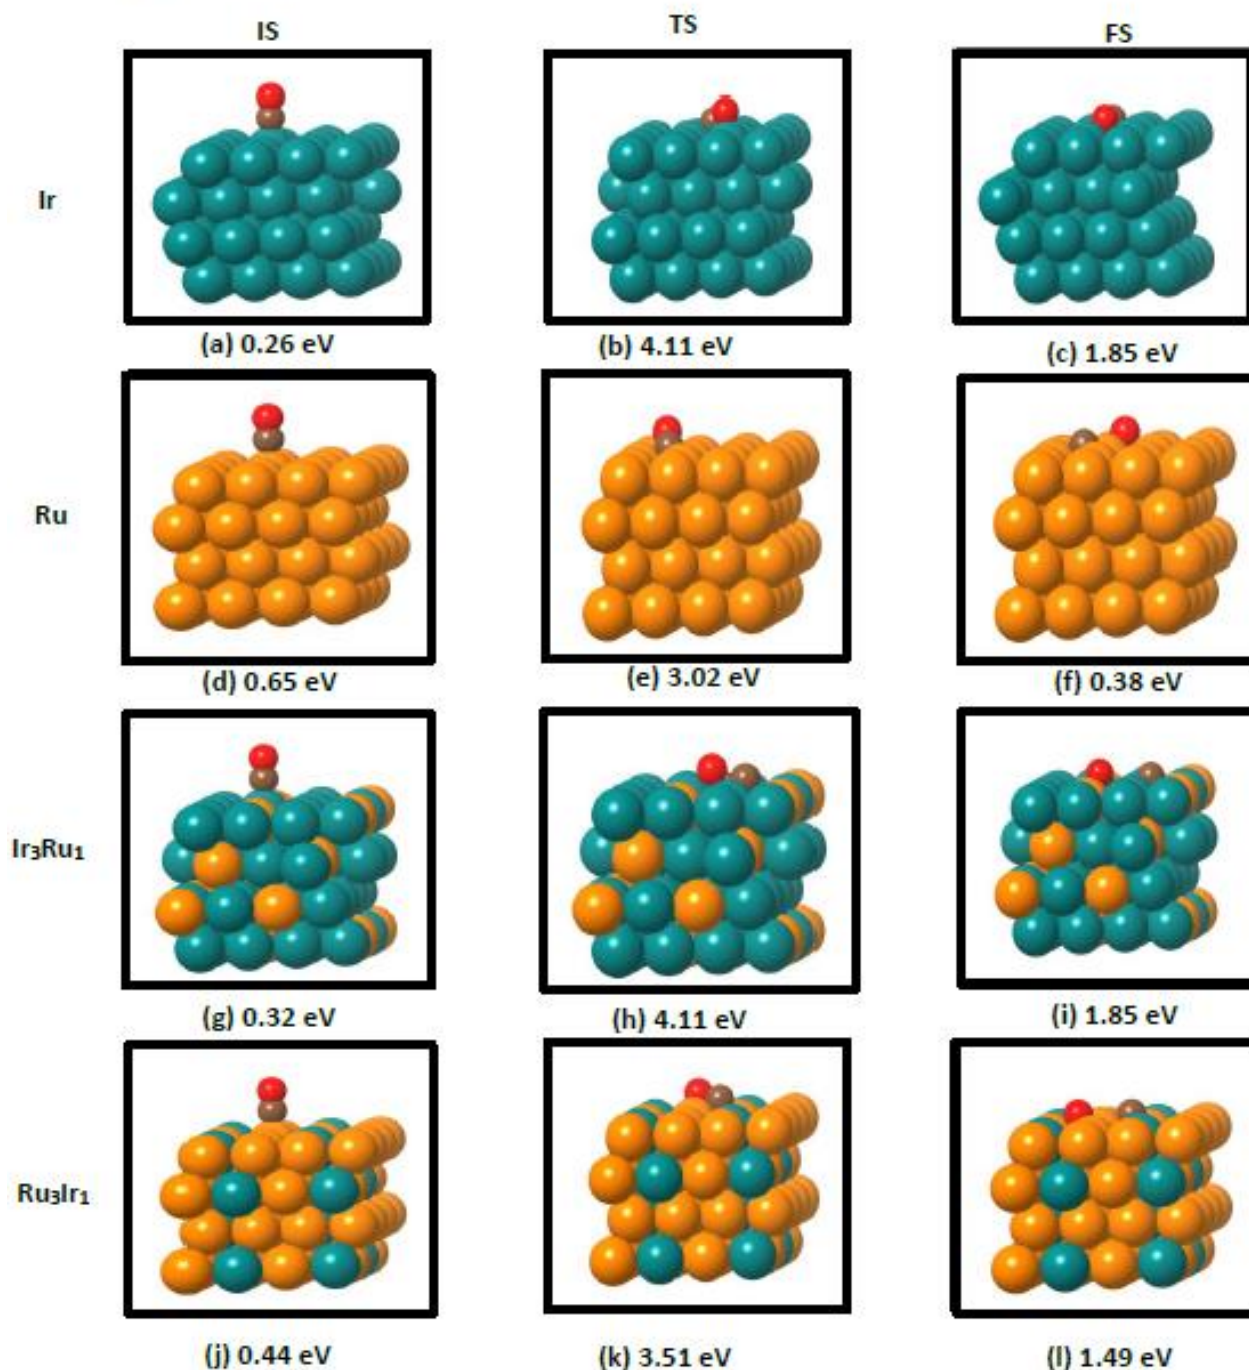

**Fig. S30.** Optimized geometry and gibbs free formation energy of CO decomposition reaction over Ir, Ru and their alloy surfaces at  $T = 200\text{ }^\circ\text{C}$  and  $P = 0.1\text{ MPa}$ . To calculate the formation energy, we used  $\text{H}_2\text{O}$ ,  $\text{N}_2$ ,  $\text{CH}_4$ , and  $\text{H}_2$  as standard electronic energies. Green, orange, red, and brown balls represent the Ir, Ru, O, and C, respectively.

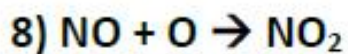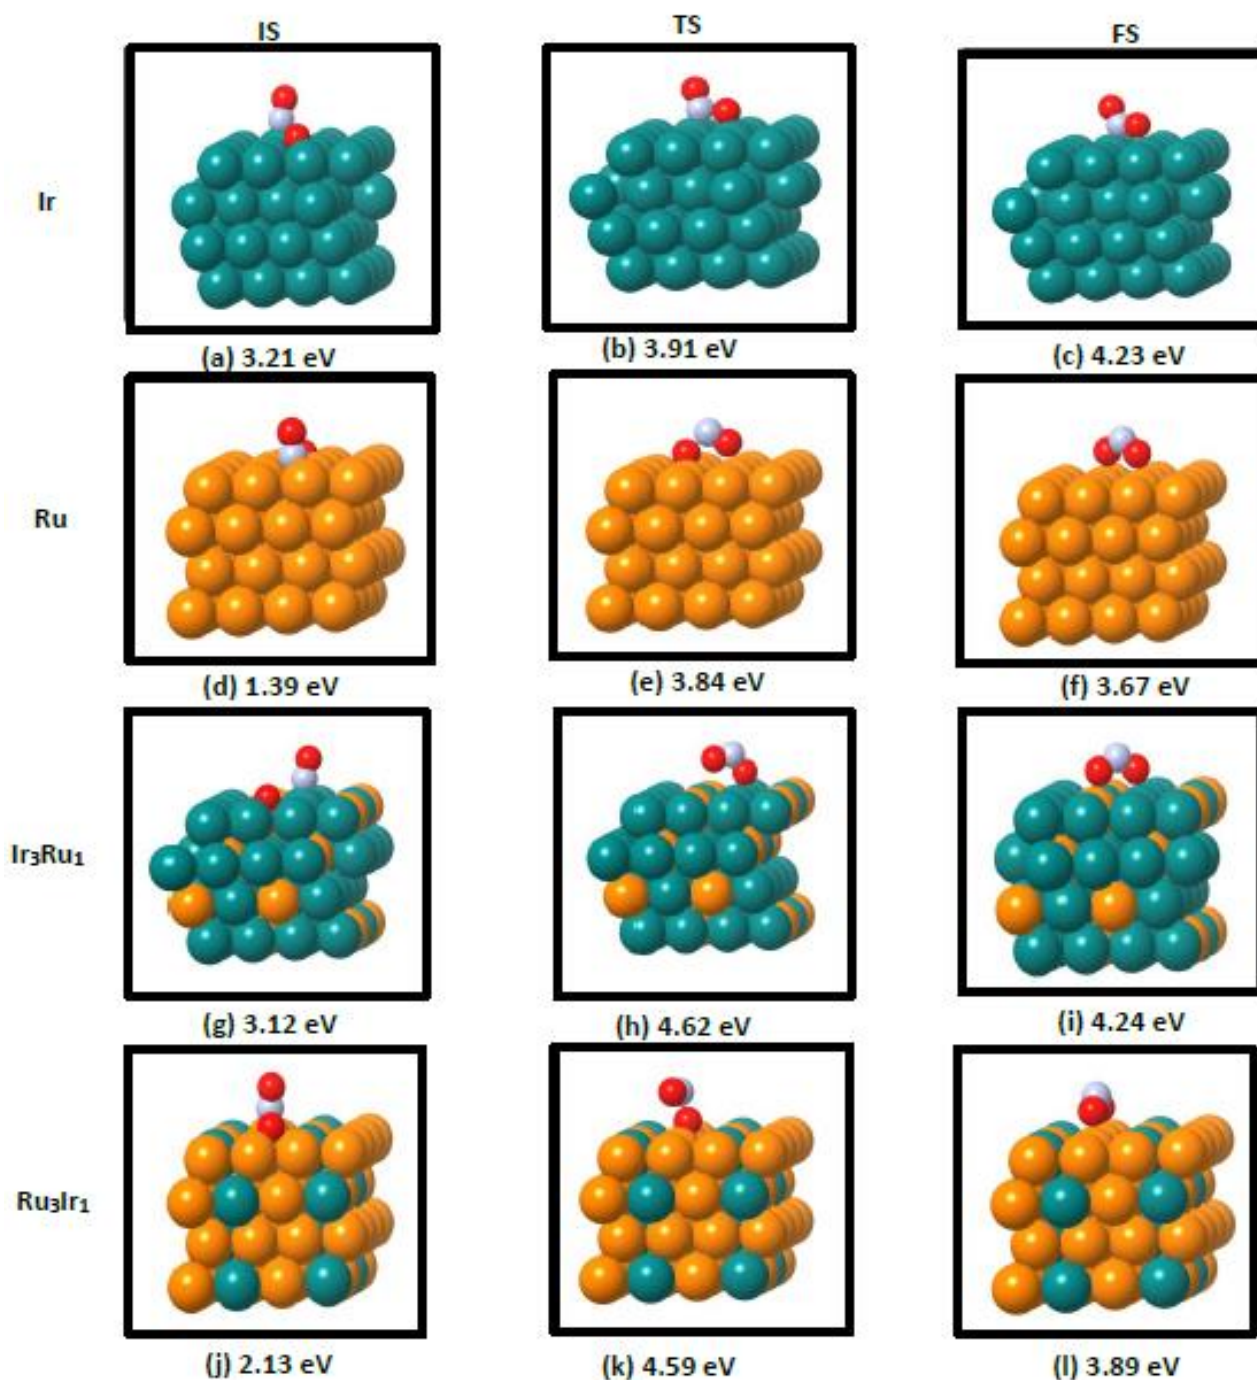

**Fig. S31.** Optimized geometry and gibbs free formation energy of  $\text{NO}_2$  formation reaction over Ir, Ru and their alloy surfaces at  $T = 200\text{ }^\circ\text{C}$  and  $P = 0.1\text{ MPa}$ . To calculate the formation energy, we used  $\text{H}_2\text{O}$ ,  $\text{N}_2$ ,  $\text{CH}_4$ , and  $\text{H}_2$  as standard electronic energies. Green, orange, red, and violet balls represent the Ir, Ru, O, and N, respectively.

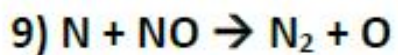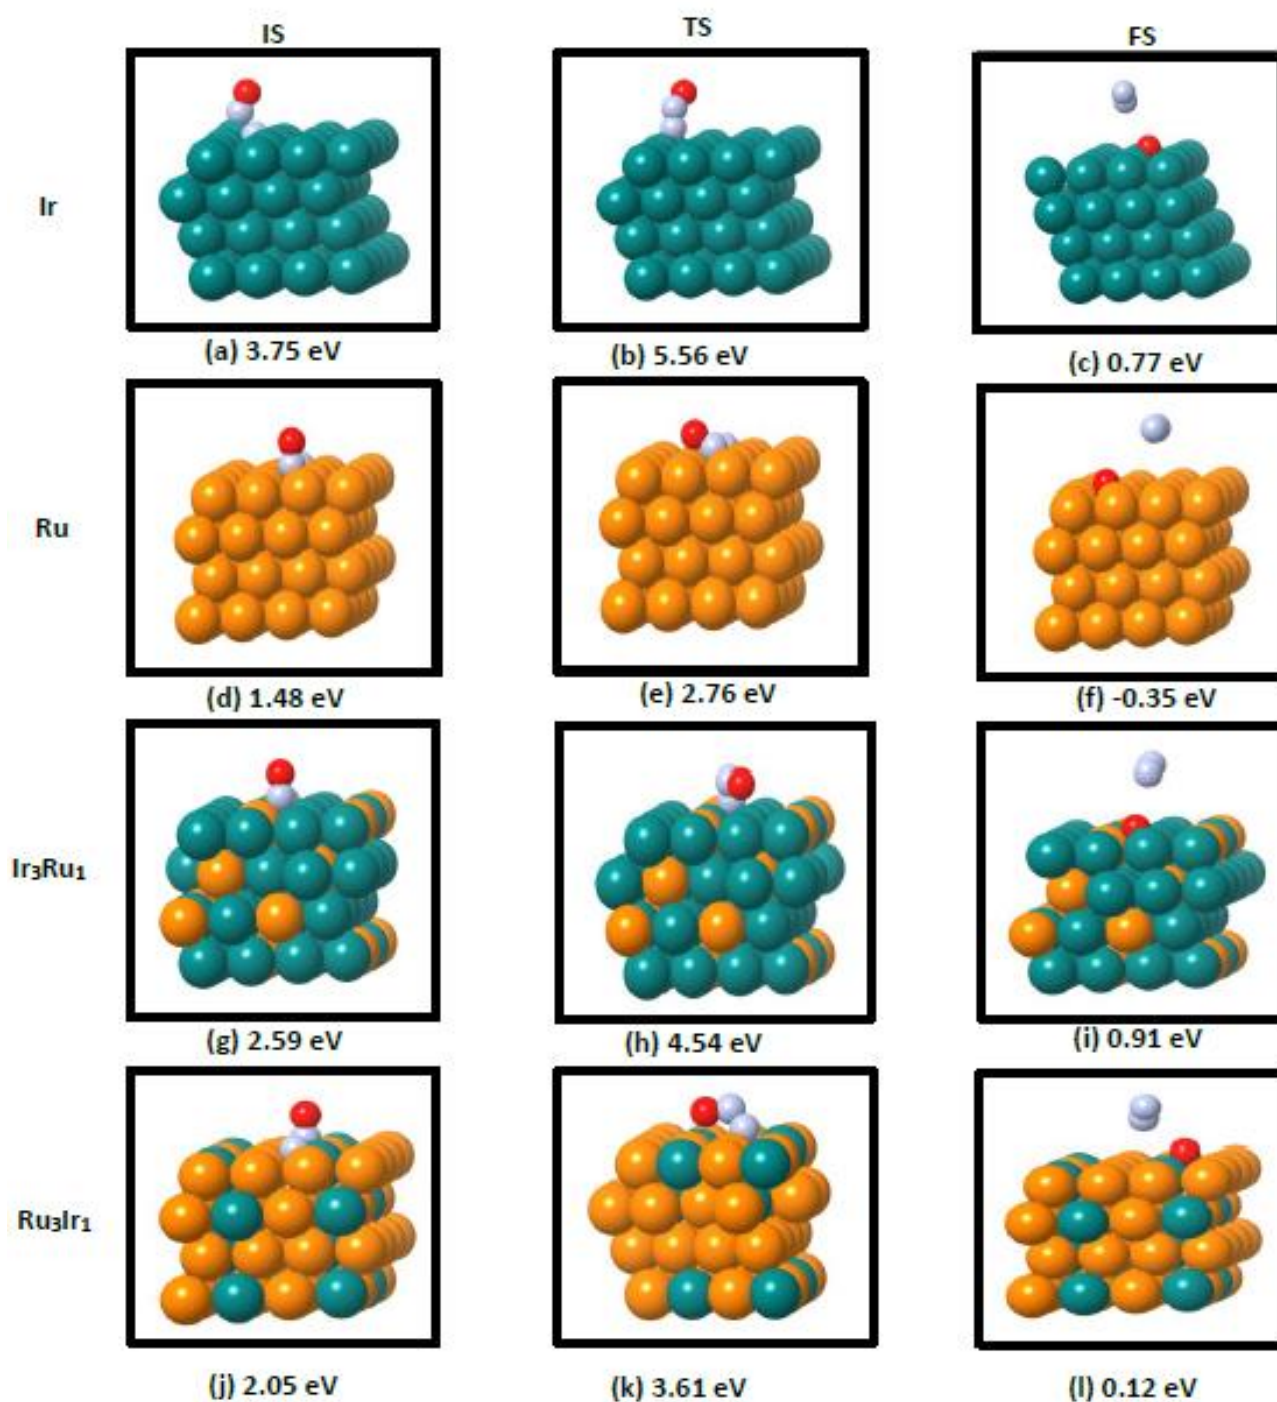

**Fig. S32.** Optimized geometry and gibbs free formation energy of  $\text{N}_2$  formation reaction over Ir, Ru and their alloy surfaces at  $T = 200\text{ }^\circ\text{C}$  and  $P = 0.1\text{ MPa}$ . To calculate the formation energy, we used  $\text{H}_2\text{O}$ ,  $\text{N}_2$ ,  $\text{CH}_4$ , and  $\text{H}_2$  as standard electronic energies. Green, orange, red, and violet balls represent the Ir, Ru, O, and N, respectively.
